# Supplementary material for: Engineered probiotic overcomes pathogen defences using signal interference and antibiotic production to treat infection in mice
Source: PubMed Central journal article supplement (PMC10847043; doi:10.1038/s41564-023-01583-9), 2024-01-16
Supplement: 41564_2023_1583_MOESM1_ESM.pdf [file 41564_2023_1583_MOESM1_ESM.pdf]

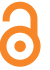

# **Engineered probiotic overcomes pathogen defences using signal interference and antibiotic production to treat infection in mice**

---

In the format provided by the authors and unedited

1 Fig S1

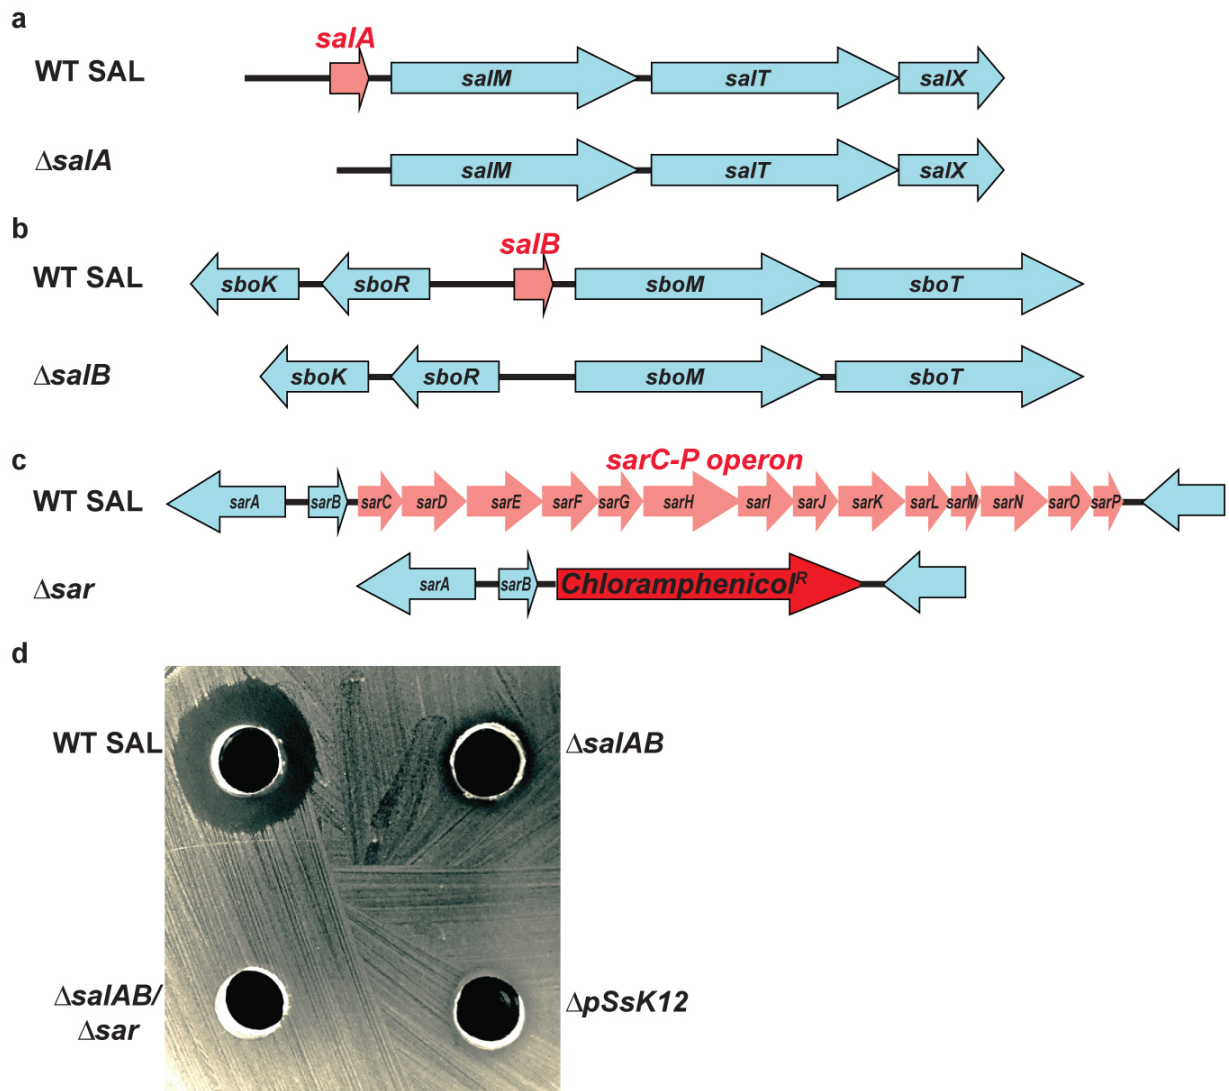

2

3 **Figure S1. Schematics of the SAL mutant strains used to characterize**  
 4 **antimicrobial activity.** Organization of *salA* (a), *salB* (b), and *sarA-P* (c)  
 5 in the megaplasmid of WT SAL (top panel) and their respective mutant strains (bottom  
 6 panel) are shown. The *salA* and *salB* genes were inactivated by marker less deletion,  
 7 whereas *sarC-P* deletion was achieved by replacing the entire *sar* operon with  
 8 chloramphenicol resistance marker. The horizontal arrows indicate genes in the  
 9 immediate vicinity of *salA*, *salB* and *sar* operon. The arrowheads indicate the predicted  
 10 direction of the transcription of associated genes. **d**, A representative uncropped  
 11 image of an agar plate showing the anti-GAS activity of indicated SAL strains. GAS  
 12 lawn was grown on a Todd-Hewitt agar plate supplemented with yeast extract (THY).  
 13 Cultures of WT SAL, the lantibiotic-deficient  $\Delta salAB$  mutant, the lantibiotic and  
 14 salivabactin-deficient ( $\Delta salAB/\Delta sar$ ), and the megaplasmid cured ( $\Delta pSsK12$ ) strains  
 15 were grown to late-exponential phase of growth ( $A_{600} \sim 2.0$ ) and 20  $\mu$ l of bacterial

16 growth was spotted in wells on the agar plate containing GAS lawn. The zone of  
17 inhibition was visualized after 16 h incubation at 37°C.

18

19

20

21

22

23

24

25

26

27

28

29

30

31

32

33

34

35

36

37

38

39

40

41 Fig S2

| <b>Protein</b> | <b>Locus tag</b>  | <b>Deduced role</b>               |
|----------------|-------------------|-----------------------------------|
| SarA           | <i>RSSL_00023</i> | Transcriptional regulator         |
| SarB           | N/A               | Leaderless peptide                |
| SarC           | <i>RSSL_00024</i> | Putative DNA-binding protein      |
| SarD           | <i>RSSL_00025</i> | NRPS-PKS                          |
| SarE           | <i>RSSL_00026</i> | NPRS-PKS                          |
| SarF           | <i>RSSL_00027</i> | Dehydratase                       |
| SarG           | <i>RSSL_00028</i> | Ketoreductase                     |
| SarH           | <i>RSSL_00029</i> | PKS                               |
| SarI           | <i>RSSL_00030</i> | Thioesterase                      |
| SarJ           | <i>RSSL_00031</i> | Acyltransferase                   |
| SarK           | <i>RSSL_00032</i> | 4'-phosphopantetheinyltransferase |
| SarL           | <i>RSSL_00033</i> | Putative transposase              |
| SarM           | <i>RSSL_00034</i> | Putative transposase              |
| SarN           | <i>RSSL_00035</i> | Putative integrase/recombinase    |
| SarO           | <i>RSSL_00036</i> | Hypothetical protein              |
| SarP           | <i>RSSL_00037</i> | Hypothetical protein              |

42 **Figure S2. Deduced roles of open reading frames in the *sar* BGC.**

43

44

45

46

47

48

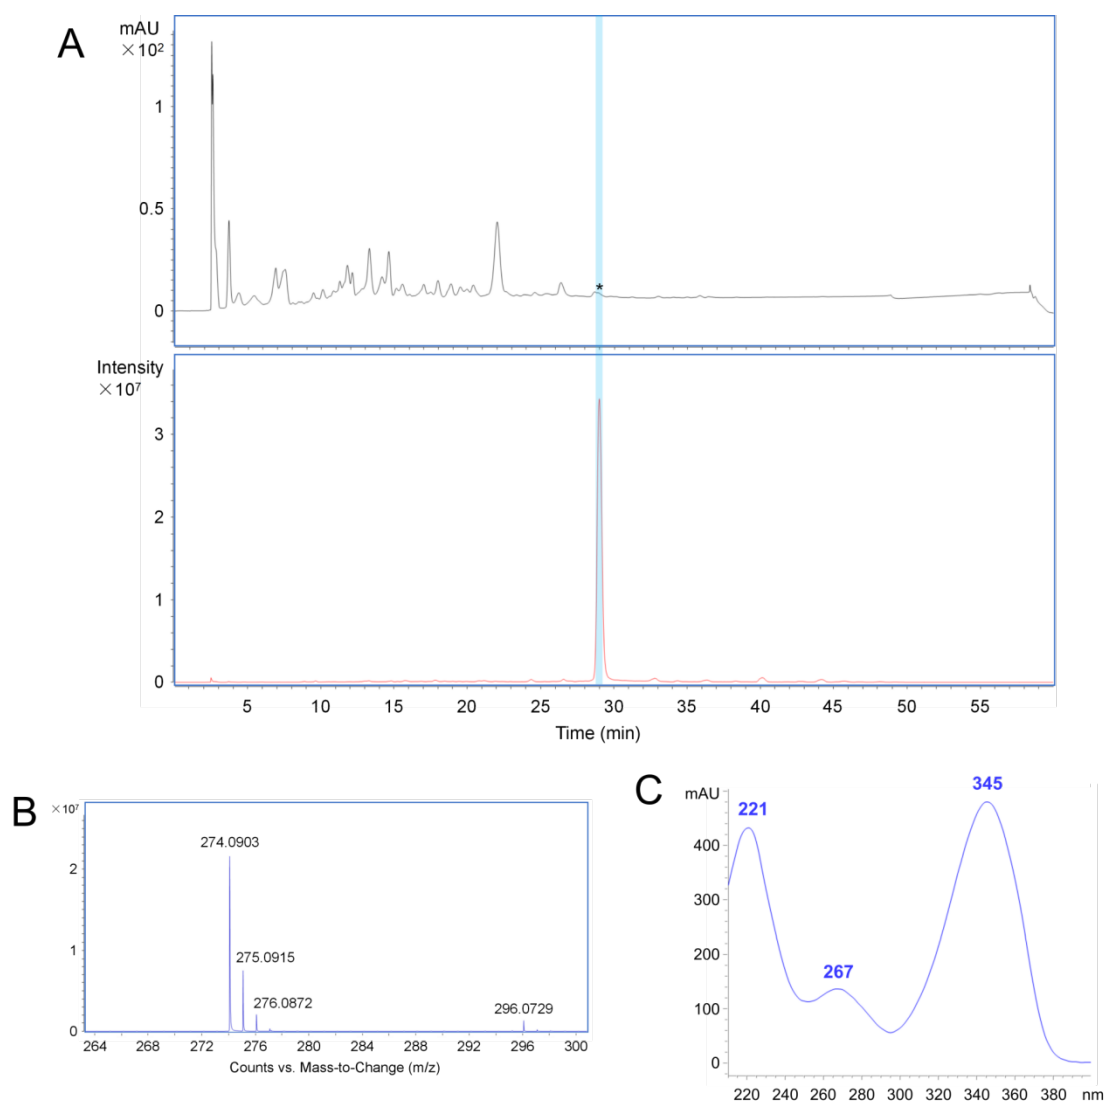

50

51

52 **Figure S3. HRMS and UV-vis analysis of salivabactin.** **a**, HPLC analysis of the  
 53 extract from SAL. The chromatogram was monitored at 345 nm (upper panel). LC-  
 54 HRMS extracted ion chromatogram trace of the same sample. EIC+ = 274.  $\pm$  0.01  
 55 (bottom panel). **b**, The high-resolution ESI-MS of salivabactin; its molecular formula  
 56 was determined as  $C_{15}H_{15}NO_2S$  on the basis of its protonated molecular ion peak at  
 57  $m/z$  274.0903 (calculated, 274.0896). **c**, UV spectrum of salivabactin.

| <b>C</b> | $\delta_c$ | $\delta_H$ (J in Hz)                           | <b>COSY</b>    | <b>HMBC (<math>^1H</math> to <math>^{13}C</math>)</b> |
|----------|------------|------------------------------------------------|----------------|-------------------------------------------------------|
| 1        | 118.5      | a 5.26 d (17.1)<br>b 5.15 d (10.1)             | 1b, 2<br>1a, 2 | 3                                                     |
| 2        | 136.1      | 6.39 ddd (17.1, 10.1, 7.6)                     | 1a, 1b, 3      | 3                                                     |
| 3        | 132.4      | 6.27 m                                         | 2, 4           | 1, 2, 5                                               |
| 4        | 131.9      | 5.86 dd (15.2, 6.9)                            | 3, 5           | 2, 5, 6                                               |
| 5        | 62.6       | 4.80 ddd (7.3, 6.9, 6.0)                       | 4, 6a, 6b      | 3, 6, 7                                               |
| 6        | 33.7       | a 3.49 dd (10.9, 7.3)<br>b 3.09 dd (10.9, 6.0) | 5, 6b<br>5, 6a | 4, 5, 7<br>4, 5, 7                                    |
| 7        | 167.0      | -                                              |                |                                                       |
| 8        | 85.6       | 5.97 s                                         |                | 7, 9                                                  |
| 9        | 184.1      | -                                              |                |                                                       |
| 10       | 130.2      | -                                              |                |                                                       |
| 11       | 129.1      | 7.73 d (8.4)                                   | 12             | 9, 13, 15                                             |
| 12       | 115.0      | 6.77 d (8.4)                                   | 11             | 10, 13, 14                                            |
| 13       | 160.3      | -                                              |                |                                                       |
| 14       | 115.0      | 6.77 d (8.4)                                   | 15             | 10, 12, 13                                            |
| 15       | 129.1      | 7.73 d (8.4)                                   | 14             | 9, 11, 13                                             |

59 **Figure S4. Structural characterization data of salivabactin A (1a).**

60

61

62

63

64

65

66

67

| <b>C</b> | $\delta_c$ | $\delta_H$ (J in Hz)                           | <b>COSY</b>    | <b>HMBC (<math>^1H</math> to <math>^{13}C</math>)</b> |
|----------|------------|------------------------------------------------|----------------|-------------------------------------------------------|
| 1        | 118.5      | a 5.25 d (17.1)<br>b 5.13 d (10.1)             | 1b, 2<br>1a, 2 | 3<br>3                                                |
| 2        | 136.2      | 6.39 ddd (17.1, 10.1, 7.6)                     | 1a, 1b, 3      | 3                                                     |
| 3        | 132.3      | 6.27 m                                         | 2, 4           | 1, 2, 5                                               |
| 4        | 132.7      | 5.80 dd (15.2, 7.0)                            | 3, 5           | 2, 5, 6                                               |
| 5        | 59.8       | 4.46 ddd (7.5, 7.0, 6.9)                       | 4, 6a, 6b      | 3, 6, 7                                               |
| 6        | 34.6       | a 3.25 dd (11.0, 7.5)<br>b 2.85 dd (11.0, 6.9) | 5, 6b<br>5, 6a | 4, 5, 7<br>4, 5, 7                                    |
| 7        | 167.9      | -                                              |                |                                                       |
| 8        | 87.0       | 6.30 s                                         |                | 7, 9                                                  |
| 9        | 183.4      | -                                              |                |                                                       |
| 10       | 131.0      | -                                              |                |                                                       |
| 11       | 128.7      | 7.62 d (8.4)                                   | 12             | 9, 13, 15                                             |
| 12       | 114.9      | 6.78 d (8.4)                                   | 11             | 10, 13, 14                                            |
| 13       | 160.0      | -                                              |                |                                                       |
| 14       | 114.9      | 6.78 d (8.4)                                   | 15             | 10, 12, 13                                            |
| 15       | 128.7      | 7.62 d (8.4)                                   | 14             | 9, 11, 13                                             |
| NH       |            | 8.46 s                                         |                | 5, 6, 7                                               |

69 **Figure S5. Structural characterization data of salivabactin B (1b).**

70

71

72

73

74

75

76

77 Fig S6

78

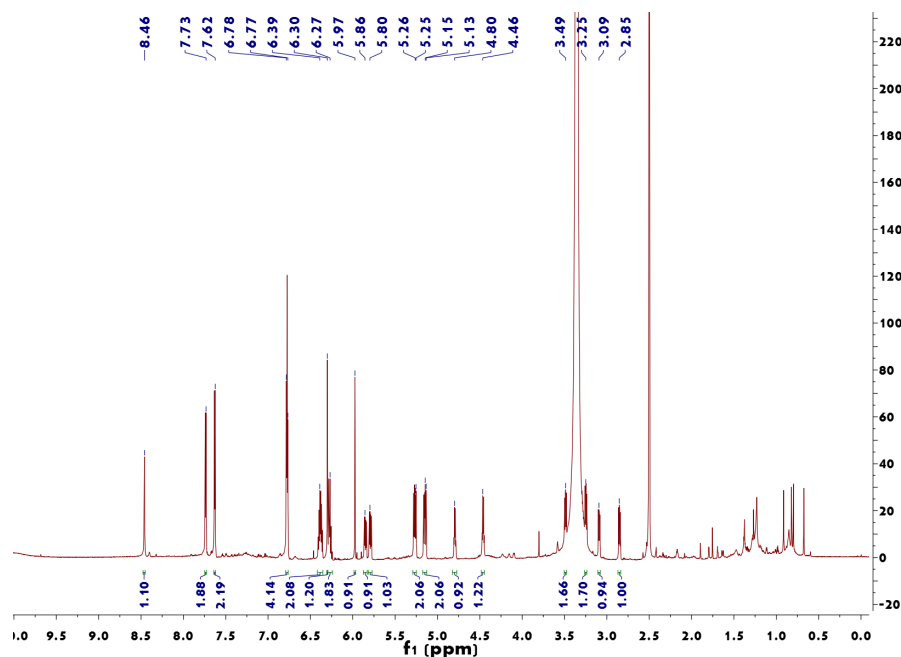

79

80

81

82

83

84

85

86

87

88

89

90

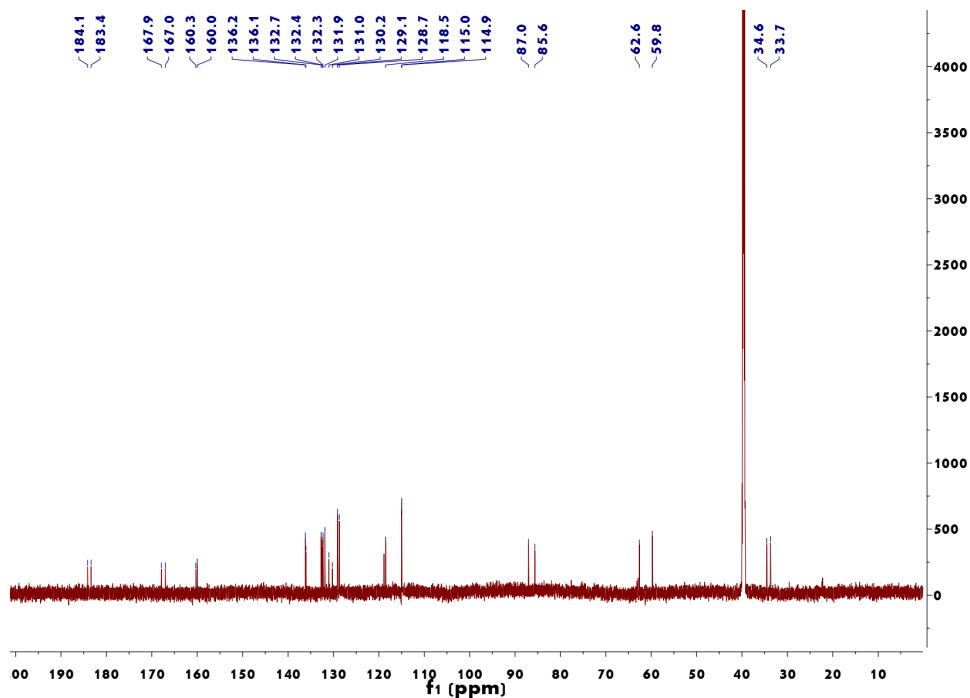

91 **Figure S6. NMR spectra of salivabactin.** <sup>1</sup>H NMR spectrum (top) (recorded in  
92 DMSO-*d*<sub>6</sub> at 900 MHz) and <sup>13</sup>C NMR spectrum (bottom) (recorded in DMSO-*d*<sub>6</sub> at 225  
93 MHz).



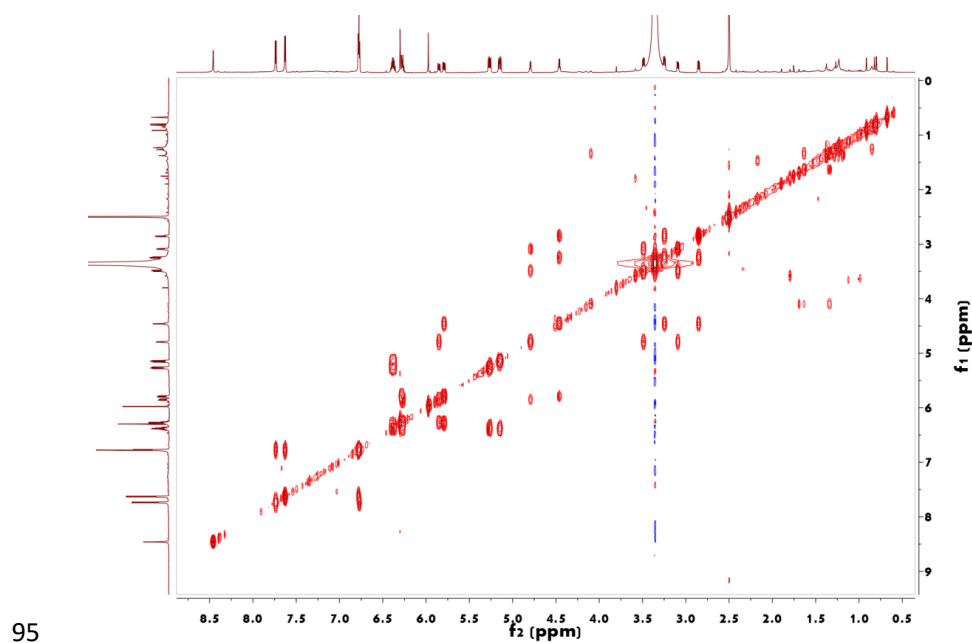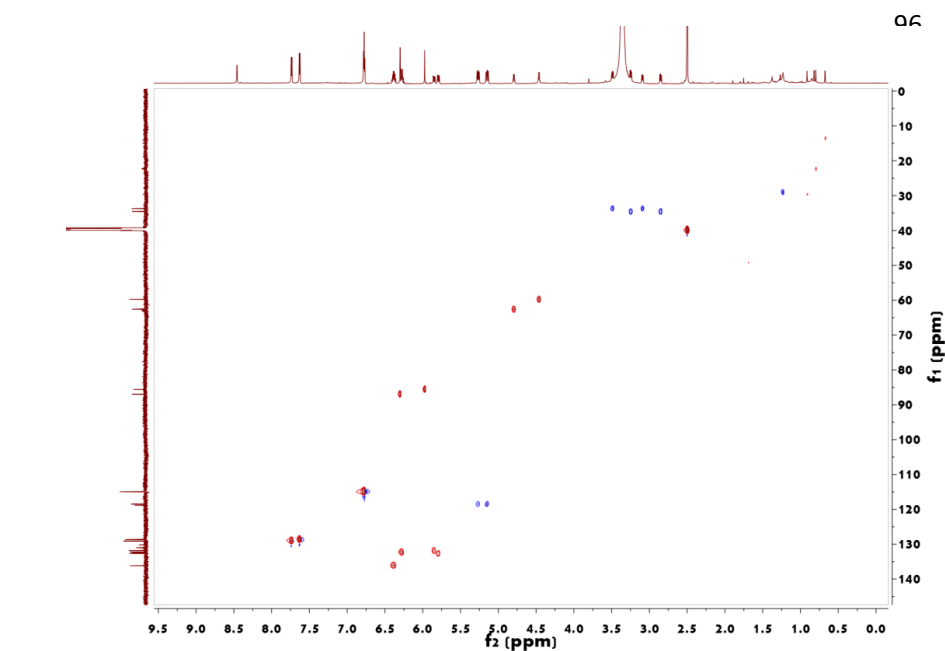

105 **Figure S7. NMR spectra of salivabactin.**  $^1\text{H}$ - $^1\text{H}$  COSY spectrum (top) (recorded in  
106 DMSO- $d_6$  at 900 MHz) and  $^1\text{H}$ - $^{13}\text{C}$  HSQC spectrum (bottom) (recorded in DMSO- $d_6$   
107 at 900 MHz).

108

109

110

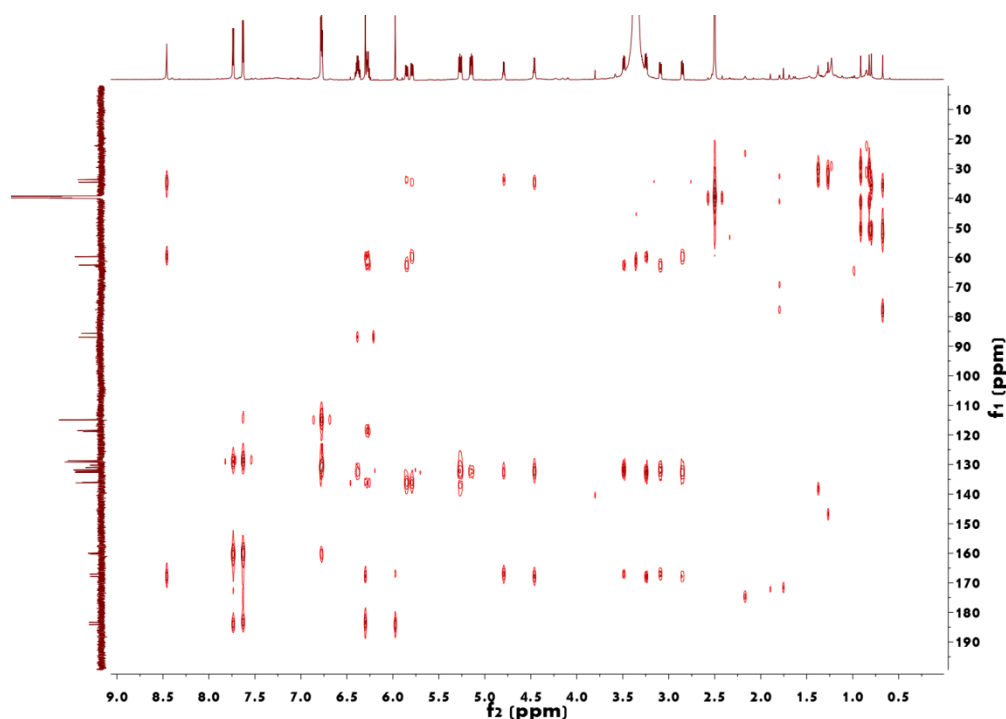

112

113

114 **Figure S8. NMR spectra of salivabactin.**  $^1\text{H}$ – $^{13}\text{C}$  HMBC spectrum (recorded in  
 115 DMSO- $d_6$  at 900 MHz).

#### 116 Supplementary note

117 Salivabactin A/B, a pair of geometric isomers, were isolated concomitantly as white amorphous  
 118 solids. The positive ion HRESIMS data revealed a peak for a protonated molecular ion at  $m/z$   
 119 274.0943 and for a sodium adduct ion at  $m/z$  296.0729, both corresponding to a molecular formula  
 120 of  $\text{C}_{15}\text{H}_{15}\text{O}_2\text{NS}$ . The isomers'  $^1\text{H}$  NMR and HSQC spectra displayed signals for one hydrogen  
 121 group ( $\delta_{\text{H}}$  8.46, NH of salivabactin B), eight aromatic methines of two individual AA'BB' *para*-  
 122 aromatic spin systems [ $\delta_{\text{H}}$  7.73, H-11 and H-15 of salivabactin B (2H);  $\delta_{\text{H}}$  7.62, H-11 and H-15 of  
 123 salivabactin A (2H);  $\delta_{\text{H}}$  6.78, H-12 and H-14 of salivabactin B (2H) and  $\delta_{\text{H}}$  6.77, H-12 and H-14 of  
 124 salivabactin A (2H)], eight vinyl methines [ $\delta_{\text{H}}$  6.39, H-2 of salivabactin A and B (2H);  $\delta_{\text{H}}$  6.30, H-8  
 125 of salivabactin B (1H);  $\delta_{\text{H}}$  6.27, H-3 of salivabactin A and B (2H);  $\delta_{\text{H}}$  5.97, H-8 of salivabactin A  
 126 (1H);  $\delta_{\text{H}}$  5.86, H-4 of salivabactin A (1H) and  $\delta_{\text{H}}$  5.80, H-4 of salivabactin B (1H)], two vinyl  
 127 methylenes [ $\delta_{\text{H}}$  5.26, H-1a of salivabactin A (1H);  $\delta_{\text{H}}$  5.25, H-1a of salivabactin B (1H);  $\delta_{\text{H}}$  5.15, H-  
 128 1b of salivabactin A (1H) and  $\delta_{\text{H}}$  5.13, H-1b of salivabactin B (1H)], two heteromethines [ $\delta_{\text{H}}$  4.80,  
 129 H-5 of salivabactin A (1H) and  $\delta_{\text{H}}$  4.46, H-5 of salivabactin B (1H)], and two heteromethylenes [ $\delta_{\text{H}}$   
 130 3.49, H-6a of salivabactin A (1H);  $\delta_{\text{H}}$  3.25, H-6a of salivabactin B (1H);  $\delta_{\text{H}}$  3.09, H-6b of salivabactin  
 131 A (1H) and  $\delta_{\text{H}}$  2.85, H-6b of salivabactin B (1H)]. Furthermore, the  $^{13}\text{C}$  NMR and HSQC spectra

132 showed signals for two ketones ( $\delta_c$  184.1, C-9 of salivabactin A;  $\delta_c$  183.4, C-9 of salivabactin B),  
133 four hetero bearing carbons ( $\delta_c$  167.9, C-7 of salivabactin B;  $\delta_c$  167.0, C-7 of salivabactin A;  $\delta_c$   
134 160.4, C-13 of salivabactin A;  $\delta_c$  160.0, C-13 of salivabactin B), sixteen methine  $sp^2$  carbons ( $\delta_c$   
135 136.2, C-2 of salivabactin B;  $\delta_c$  136.1, C-2 of salivabactin A;  $\delta_c$  132.7, C-4 of salivabactin B;  $\delta_c$   
136 132.4, C-3 of salivabactin A;  $\delta_c$  132.3, C-3 of salivabactin B;  $\delta_c$  131.9, C-4 of salivabactin A;  $\delta_c$   
137 129.1, C-11/C-15 of salivabactin A;  $\delta_c$  128.7, C-11/C-15 of salivabactin B;  $\delta_c$  115.0, C-12/C-14 of  
138 salivabactin A;  $\delta_c$  114.9, C-12/C-14 of salivabactin B;  $\delta_c$  87.0, C-8 of salivabactin B;  $\delta_c$  85.5, C-8  
139 of salivabactin A), two normal quaternary  $sp^2$  carbons ( $\delta_c$  131.0, C-10 of salivabactin B;  $\delta_c$  130.2,  
140 C-10 of salivabactin A), two methylene  $sp^2$  carbons ( $\delta_c$  118.5, C-1 of salivabactin A and B), two  
141 hetero bearing methine  $sp^3$  carbons ( $\delta_c$  62.6, C-5 of salivabactin A;  $\delta_c$  59.8, C-5 of salivabactin B),  
142 and two hetero bearing methylene  $sp^3$  carbons ( $\delta_c$  34.6, C-6 of salivabactin B;  $\delta_c$  33.7, C-6 of  
143 salivabactin A).

144

145 The presence of two independent terminal diene units was proposed by their proton-proton  
146 coupling constants and supported by their COSY correlations between H-1a/1b and H-2, H-2 and  
147 H-3, and H-3 and H-4. The presence of two respective thiazolidin-ylidene sections was indicated  
148 by each compound's COSY correlation between H-5 and H-6a/6b, as well as  $^3J$ -HMBC correlations  
149 between H-5/H-6a/6b and C-7. The nitrogen bearing methine of each thiazolidin-ylidene was  
150 specifically connected to each terminal diene through the COSY correlation between H-4 and H-  
151 5, along with  $^3J$ -HMBC correlations between H-5 and C-3, and H-6a/6b and C-4. The ylidene  
152 carbon of each five member ring was belonged to an  $\alpha,\beta$ -unsaturated ketone component which  
153 could be documented by  $^2J$ -HMBC correlations between H-8 and C-7/C-9. The other side of each  
154 ketone was linked to an AA'BB' *para*-aromatic spin system, based on  $^3J$ -HMBC correlations  
155 between H-11/H-15 and C-9. The *para*-substitution of each AA'BB' *p*-aromatic spin system should  
156 be a hydroxyl group due to the remaining unassigned atoms from the formula and typical oxygen  
157 bearing aromatic carbon chemical shift of C-13.

158

159 After detailed analysis of NMR data, a pair of geometric isomers were figured out through paired  
160 proton and carbon signals except the enamine proton signal. They were named as salivabactin B  
161 whose configuration of C-7 C-8 double bond was assigned as *E*, and salivabactin A that was  
162 assigned as *Z*. These two co-isolated isomers could be distinguished by the unpaired enamine  
163 proton signal ( $\delta_H$  8.46), because when the C-7 C-8 double bond was *E* configuration, the enamine  
164 proton could generate an intramolecular H-bond with ketone to present a particular signal in the  
165  $^1H$  NMR spectrum, while *Z* configuration would not show this signal. In addition, the absolute  
166 configuration of C-5 could be suggested as *R* which was relied on the biosynthesis mechanism.

167

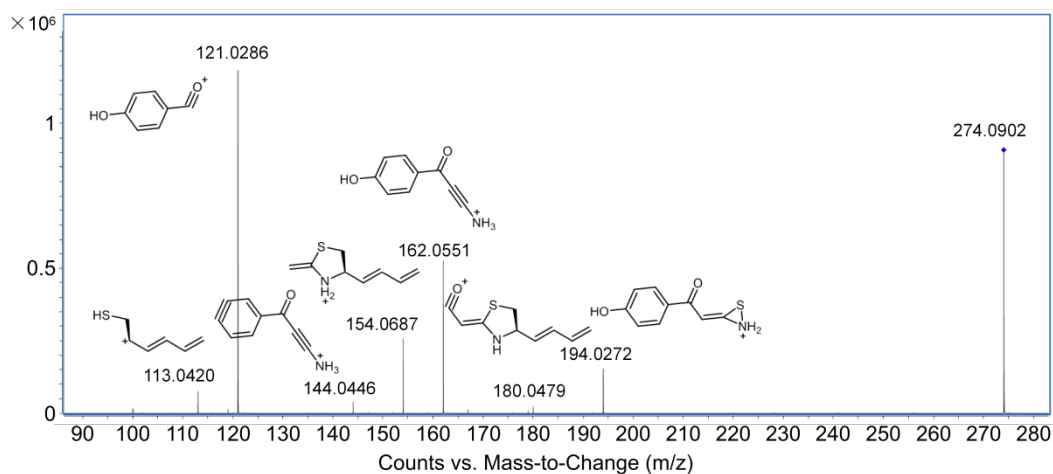

169

170

| Fragmentation<br>[M+H] <sup>+</sup> | Obs. mass | Calc. mass | Δppm |
|-------------------------------------|-----------|------------|------|
| F1                                  | 113.0420  | 113.0419   | 0.88 |
| F2                                  | 121.0286  | 121.0284   | 1.65 |
| F3                                  | 144.0446  | 144.0444   | 1.39 |
| F4                                  | 154.0687  | 154.0685   | 1.30 |
| F5                                  | 162.0551  | 162.0550   | 0.62 |
| F6                                  | 180.0479  | 180.0478   | 0.56 |
| F7                                  | 194.0272  | 194.0270   | 1.03 |

171

172 **Figure S9. HR-MS/MS fragmentation pattern of salivabactin and the major**  
 173 **fragmentation species from the measurement.** Fragmentation was acquired with  
 174 collision energy of 15 V. Obs. = observed; Calc. = calculated.

175

176

177

178

179

180

181

182

183

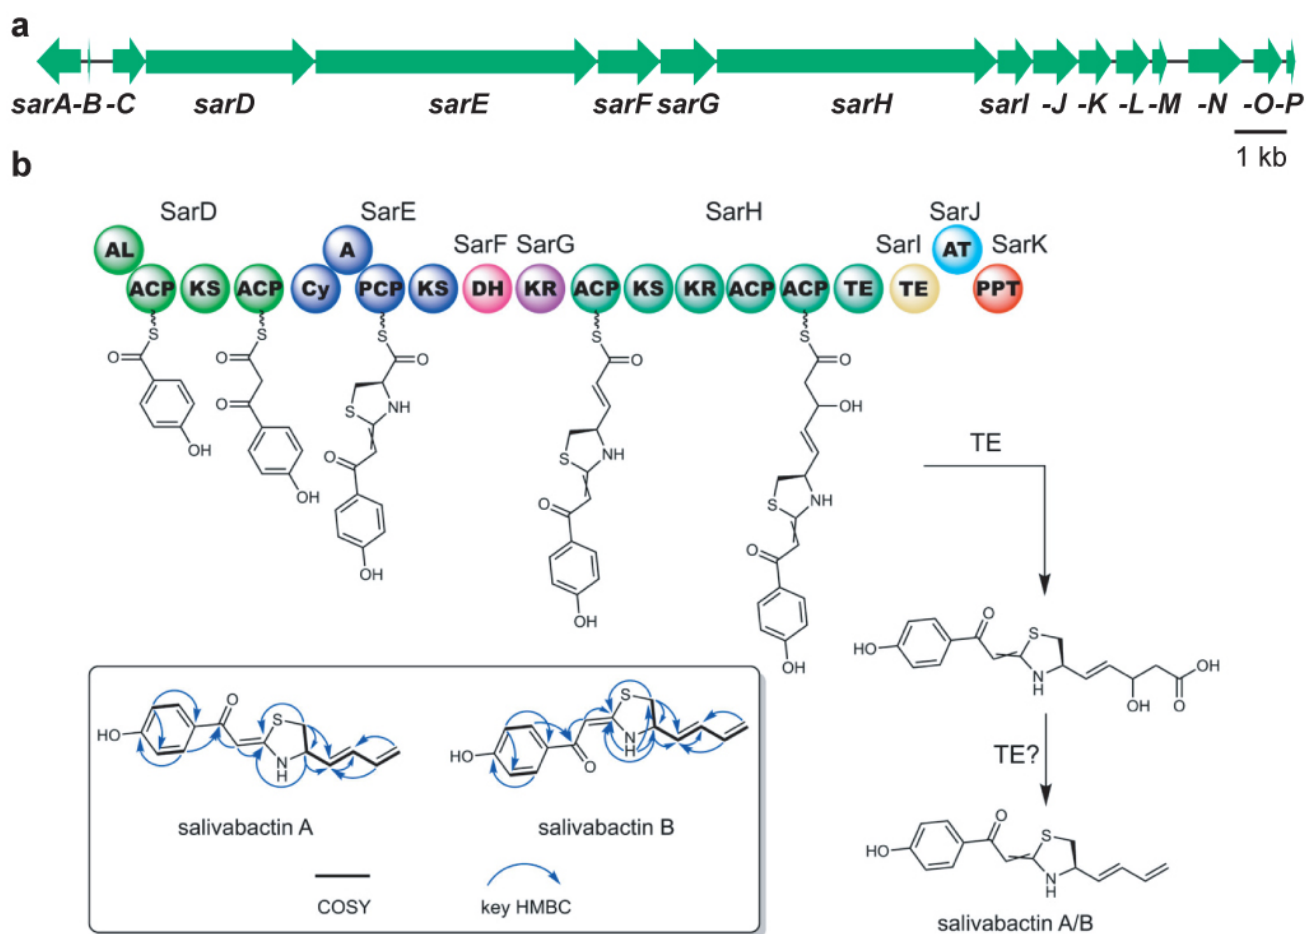

185  
 186 **Figure S10. Proposed biosynthetic pathway for salivabactin.** **a**, Organization of  
 187 the *sar* BGC. **b**, Proposed biosynthetic pathway for salivabactin. AL: acyl-ACP ligase;  
 188 ACP: acyl-carrier protein; KS, ketosynthase; Cy, cyclization; A, adenylation; PCP:  
 189 peptidyl-carrier protein; DH, dehydratase; KR, ketoreductase; TE, thioesterase; AT,  
 190 acyltransferase; PPT, 4'-phosphopantetheinyl transferase.

191 Supplementary note

192 A direct responsibility of *sar* for salivabactin production could be further confirmed by  
 193 assessing the predicted activity of the *sar*-encoded enzymes in salivabactin  
 194 biosynthesis. Specifically, *sarD-J* are predicted to encode the core *trans*-  
 195 acyltransferase (AT) polyketide synthase/non-ribosomal peptide synthetase  
 196 (PKS/NRPS) assembly line to generate the scaffold of salivabactin (**Fig. S10**). SarD  
 197 initiates chain assembly by activating and loading *p*-hydroxybenzoic acid (*p*-HBA)  
 198 followed by one round of PKS extension using malonyl-CoA. Upon activation of L-Cys  
 199 by the adenylation (A) domain of SarE, the heterocyclization (Cy) domain of SarE  
 200 promotes subsequent condensation and cyclodehydration to generate a five-  
 201 membered heterocyclic ring. Notably, instead of a typical thiazoline ring, thiazolidine-  
 202 ene is formed with a mixed configuration, possibly due to a prior unreduced ketide unit

203 <sup>1,2</sup>. The highly discrete machinery of SarE, G, F and H catalyze the next two rounds of  
204 PKS extension likely by releasing a  $\beta$ -hydroxyl acid intermediate that undergoes  
205 decarboxylation and dehydration to yield salivabactin, although the exact chain-  
206 releasing mechanism remains obscure. The proposed biosynthetic pathway of  
207 salivabactin was supported by stable isotope feeding results using [1-<sup>13</sup>C<sub>1</sub>]acetate or  
208 [1,2-<sup>13</sup>C<sub>2</sub>]acetate which showed the expected polyketide labeling patterns (**Fig. S11**).

209  
210  
211  
212  
213  
214  
215  
216  
217  
218  
219  
220  
221  
222  
223  
224  
225  
226  
227  
228  
229  
230  
231  
232  
233  
234  
235  
236  
237  
238  
239  
240  
241  
242  
243  
244  
245

246 Figure S11

247

248 **F**

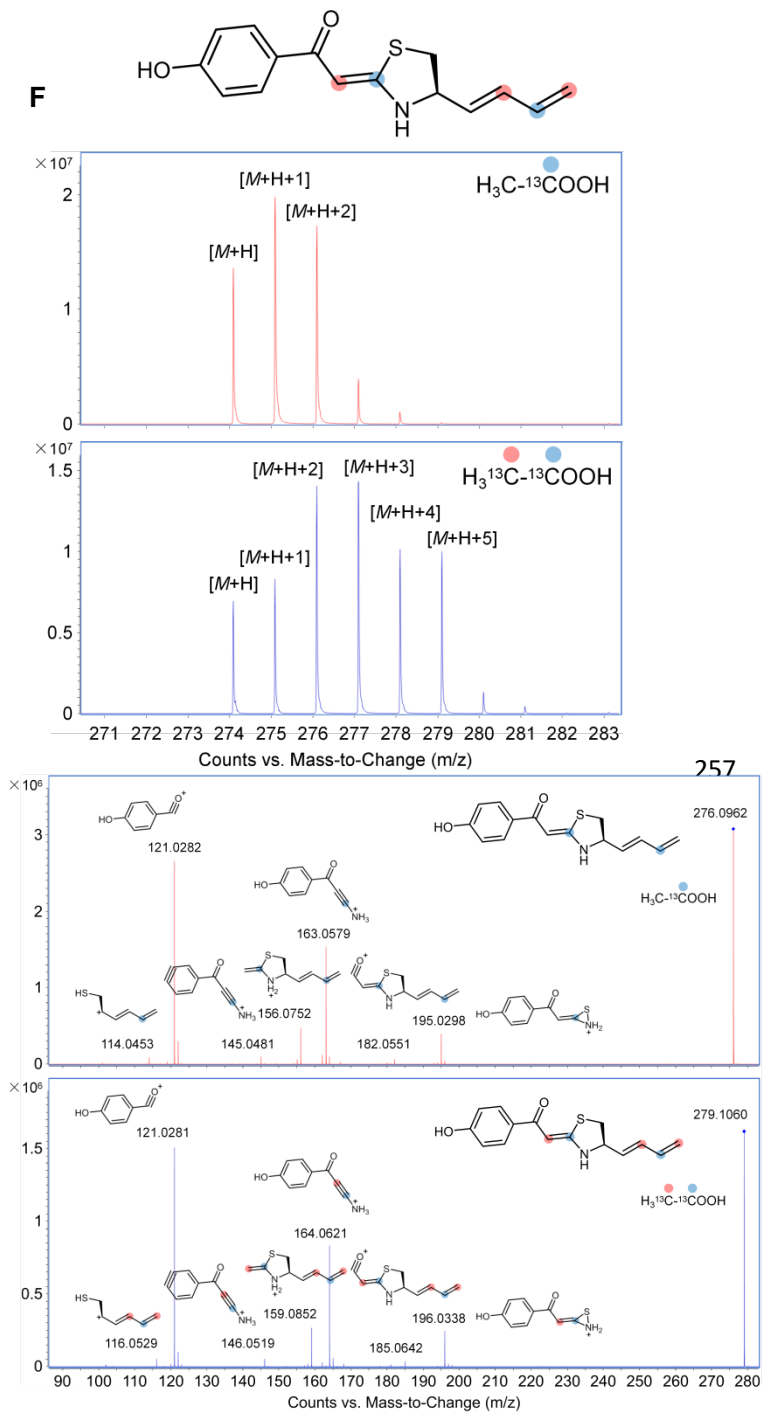

266

267

268

269

270

271

272

**Figure S11. Biosynthesis of labeled salivabactin upon precursor feeding.** Top panels showing the high-resolution ESI-MS of salivabactin after feeding sodium [1-<sup>13</sup>C<sub>1</sub>] acetate or sodium [1,2-<sup>13</sup>C<sub>2</sub>] acetate, respectively. Bottom panels showing the tandem MS-based measurements displaying that the feeding of sodium [1-<sup>13</sup>C<sub>1</sub>] acetate resulted in the expected enrichments in carbon atoms C-2 and C-7; and the feeding of sodium [1,2-<sup>13</sup>C<sub>2</sub>] acetate resulted in the expected enrichments in carbon atoms C-1, C-2, C-3, C-7 and C-8.

a

| Species and Strain                      | Salivabactin MIC (µg/ml) |
|-----------------------------------------|--------------------------|
| <b>Gram-positive pathogens</b>          |                          |
| <i>Streptococcus pyogenes</i> MGAS10870 | 2                        |
| <i>S. agalactiae</i> ATCC49447          | 2                        |
| <i>S. pneumoniae</i> ATCC49619          | 2                        |
| <i>S. mutans</i> ATCC25175              | 2                        |
| <i>S. dysgalactiae</i> ATCC12394        | 2                        |
| <i>L. monocytogenes</i> ATCC19115       | 2                        |
| <i>Staphylococcus aureus</i> ATCC33591  | 2                        |
| <i>Enterococcus faecalis</i> ATCC51299  | 2                        |
| <b>Gram-negative pathogens</b>          |                          |
| <i>Escherichia coli</i> ATCC25922       | >8                       |
| <i>Klebsiella pneumoniae</i> ATCC700603 | >8                       |
| <i>Pseudomonas aeruginosa</i> ATCC51299 | >8                       |

b

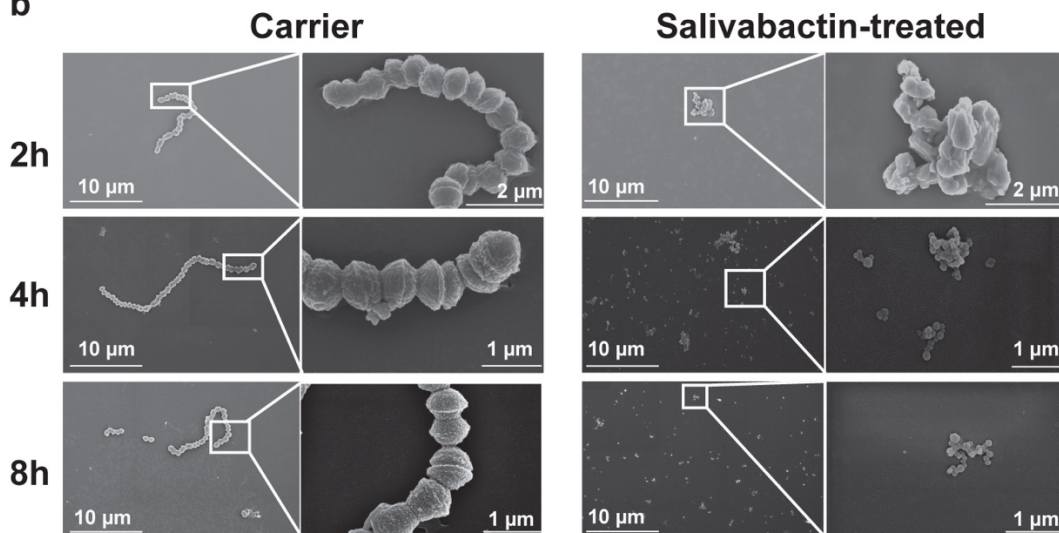

274

275 **Figure S12. Salivabactin affects bacterial cell integrity.** a, Minimum inhibitory  
 276 concentration (MIC) of salivabactin against bacterial pathogens. b, GAS ( $10^5$  CFUs/ml)  
 277 was incubated either with carrier (DMSO) (left) or 2X MIC of salivabactin (right). Cells  
 278 were collected at the indicated time points post incubation and visualized by scanning  
 279 electron microscopy. Three independent experiments were performed and  
 280 representative images are shown.



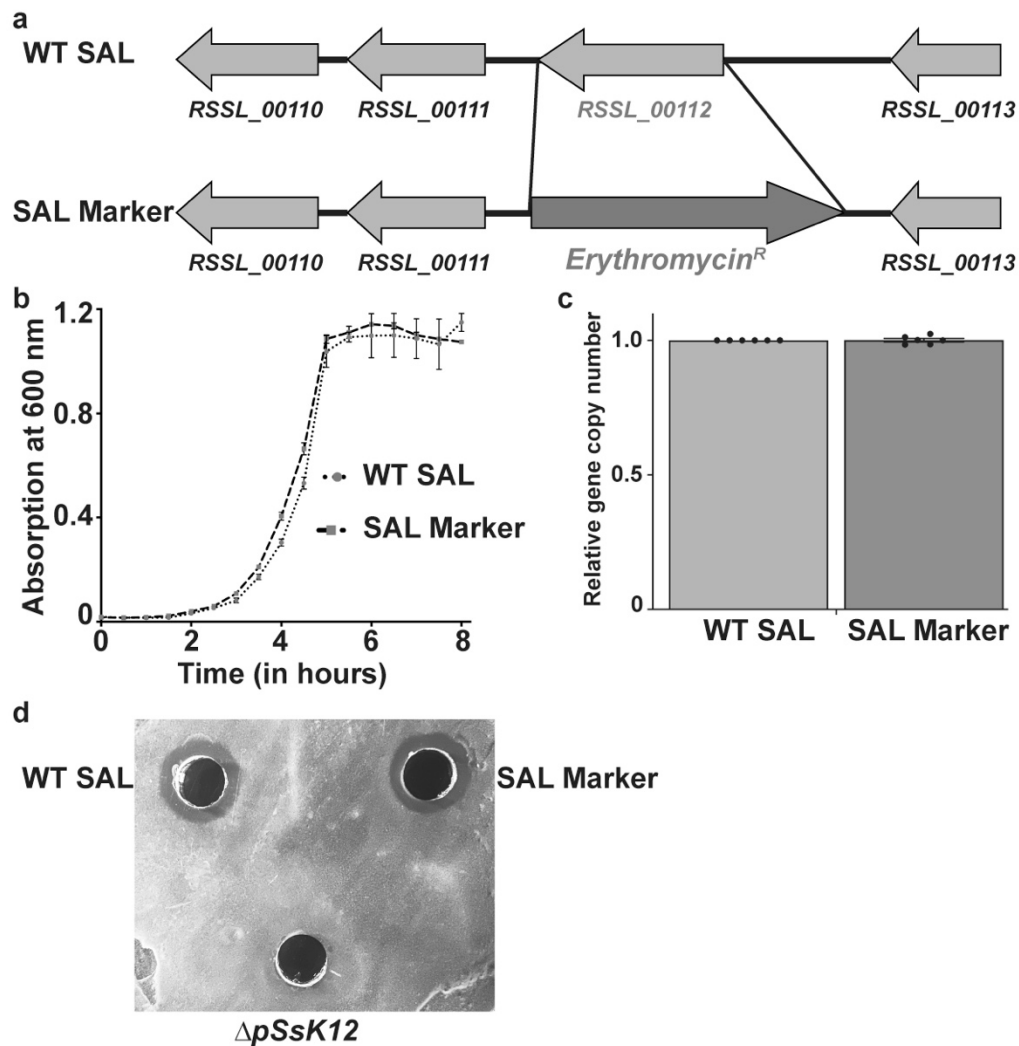

282

283 **Figure S13. Schematics of marker strain used in the co-infection studies.** For  
 284 isolation and precise assessment of SAL levels during dual species competition  
 285 studies, an erythromycin resistance marker (Erm<sup>R</sup>) was introduced at locus  
 286 RSSL\_00112 (a). The SAL marker strain was used for co-cultivation studies with GAS  
 287 *in vitro*, *ex vivo* and *in vivo* instead of unmodified WT SAL. The introduction of Erm<sup>R</sup>  
 288 did not affect the growth kinetics (b), megaplasmid copy number (c), and antimicrobial  
 289 activity (d) of the SAL marker strain. We used RNase-treated cell lysates from either  
 290 WT SAL or SAL marker to deduce the gene copy number of RSSL\_00025 encoded in  
 291 the megaplasmid, which was used to compare the megaplasmid copy number in the  
 292 two strains. Growth experiments in panel b, and gene copy number estimation assays  
 293 in panel c were derived from three independent biological replicates that were  
 294 analyzed in duplicates. In both panels b and c, data were presented as mean  $\pm$  s.e.m.  
 295 and no statistically significant differences were observed between WT SAL and SAL  
 296 marker strains.

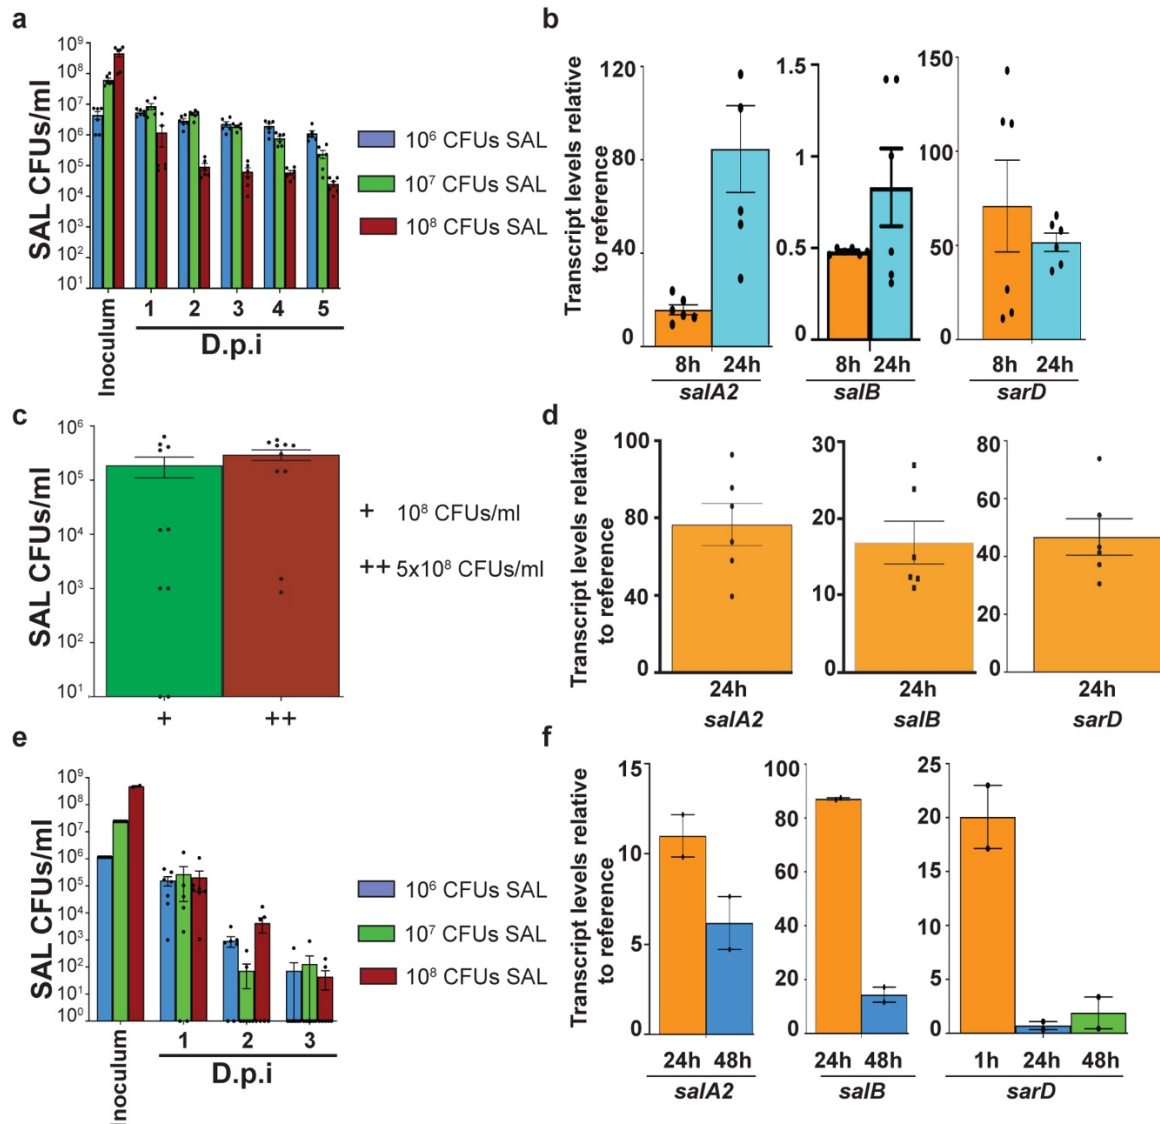

298

299 **Figure S14. SAL produce antimicrobials during co-cultivation with GAS *ex vivo***  
 300 **and *in vivo*.** SAL was grown in the presence of GAS *ex vivo* in sterile human saliva.  
 301 Samples were collected at the indicated time points (days post infection, D.p.i) and  
 302 SAL (a) levels were assessed by enumerating colony-forming units (CFUs) per ml of  
 303 saliva. b, Transcript levels of salivaricin A (*salA2*), salivaricin B (*salB*), and *sarD*  
 304 during dual species growth in human saliva as assessed by qRT-PCR are shown. c, SAL  
 305 were injected intranasally with 10<sup>8</sup> CFUs of GAS in mice (*n*=10 per group). Samples  
 306 were collected at 1 d.p.i and SAL (c) levels were assessed by enumerating CFUs per  
 307 ml of swab eluate. d, Transcript levels of *salA2*, *salB*, and *sarD* during co-colonization  
 308 in mouse nasopharynx as assessed by qRT-PCR. Individual samples from each group  
 309 (*n*=6 per group) were used for RNA extraction and transcript level analyses. Indicated  
 310 doses of SAL were injected intravaginally in mice (*n*=5 per group) and 24 h later, mice

311 were inoculated intravaginally with  $10^3$  CFUs of GAS. Samples were collected at the  
312 indicated time points and SAL (e) levels were assessed by enumerating CFUs per ml  
313 of swab eluate. f) Transcript levels of *salA2*, *salB*, and *sarD* during co-colonization in  
314 mouse vaginal lumen as assessed by qRT-PCR. Pooled samples from each group  
315 ( $n=5$  per group) were used for RNA extraction and transcript level analyses. Samples  
316 were analyzed in duplicate. Transcript levels of respective genes in SAL grown in  
317 laboratory medium to early exponential phase of growth ( $A_{600} \sim 0.5$ ) were used as a  
318 reference. Fold change differences in transcript levels relative to reference (reference  
319 transcript level=1) is shown. The reference growth was performed in 3 independent  
320 occasions and analyzed in duplicate. Bars represent mean  $\pm$  s.e.m.

321

322

323

324

325

326

327

328

329

330

331

332

333

334

335

336

337

338

339

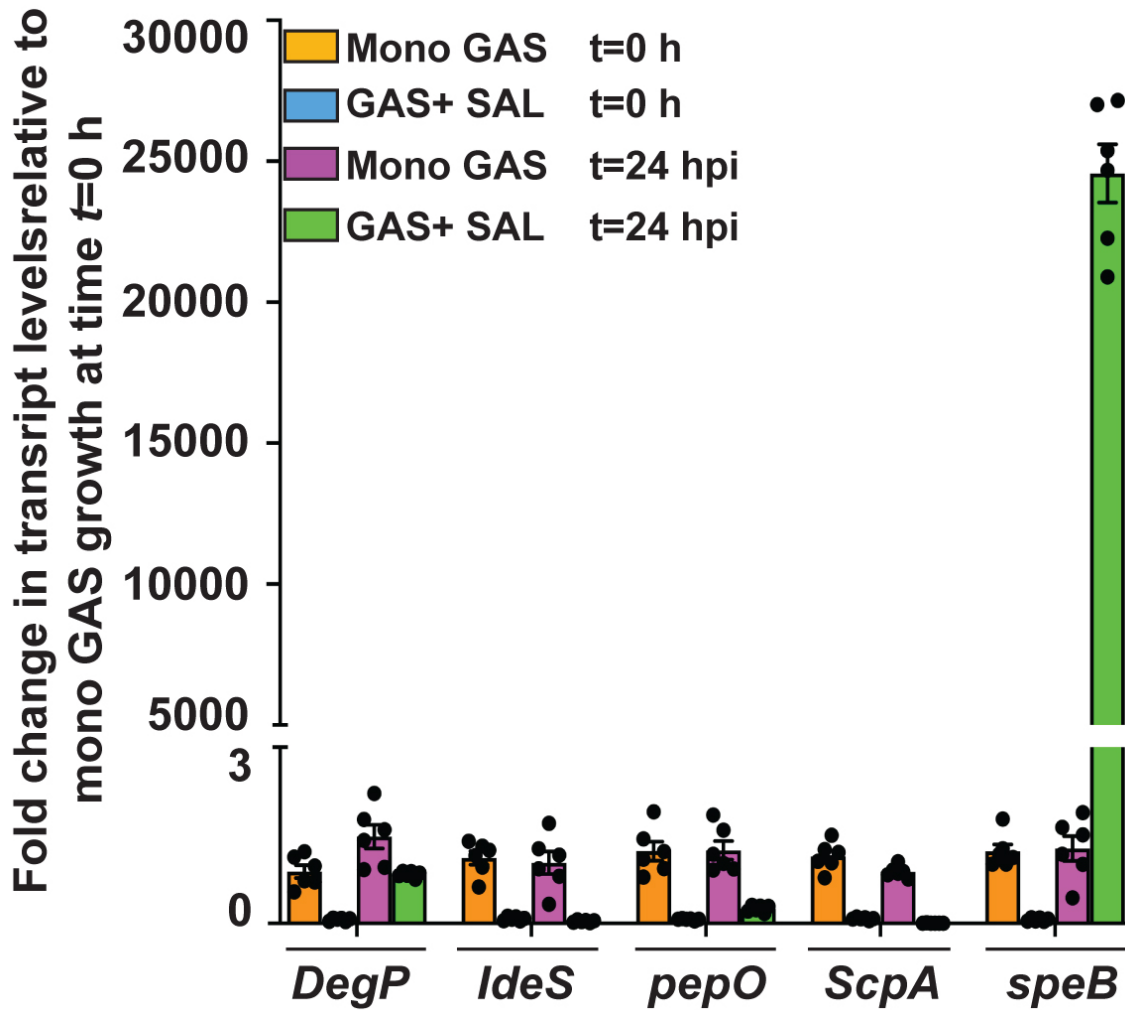

341

342 **Figure S15. Expression of *speB* encoding secreted GAS cysteine protease is**  
 343 **specifically upregulated during co-cultivation with SAL in human saliva. GAS**  
 344 **was grown in the absence (Mono GAS) or presence of  $10^7$  CFUs/ml of SAL (GAS+SAL)**  
 345 **in human saliva *ex vivo*. Samples were collected at the indicated time points and**  
 346 **assessed for the expression of genes encoding GAS extracellular proteases by qRT-**  
 347 **PCR. Experiment was performed as three biological replicates and analyzed in**  
 348 **duplicate. Data graphed were mean  $\pm$  s.e.m.**

349

350

351

352

353

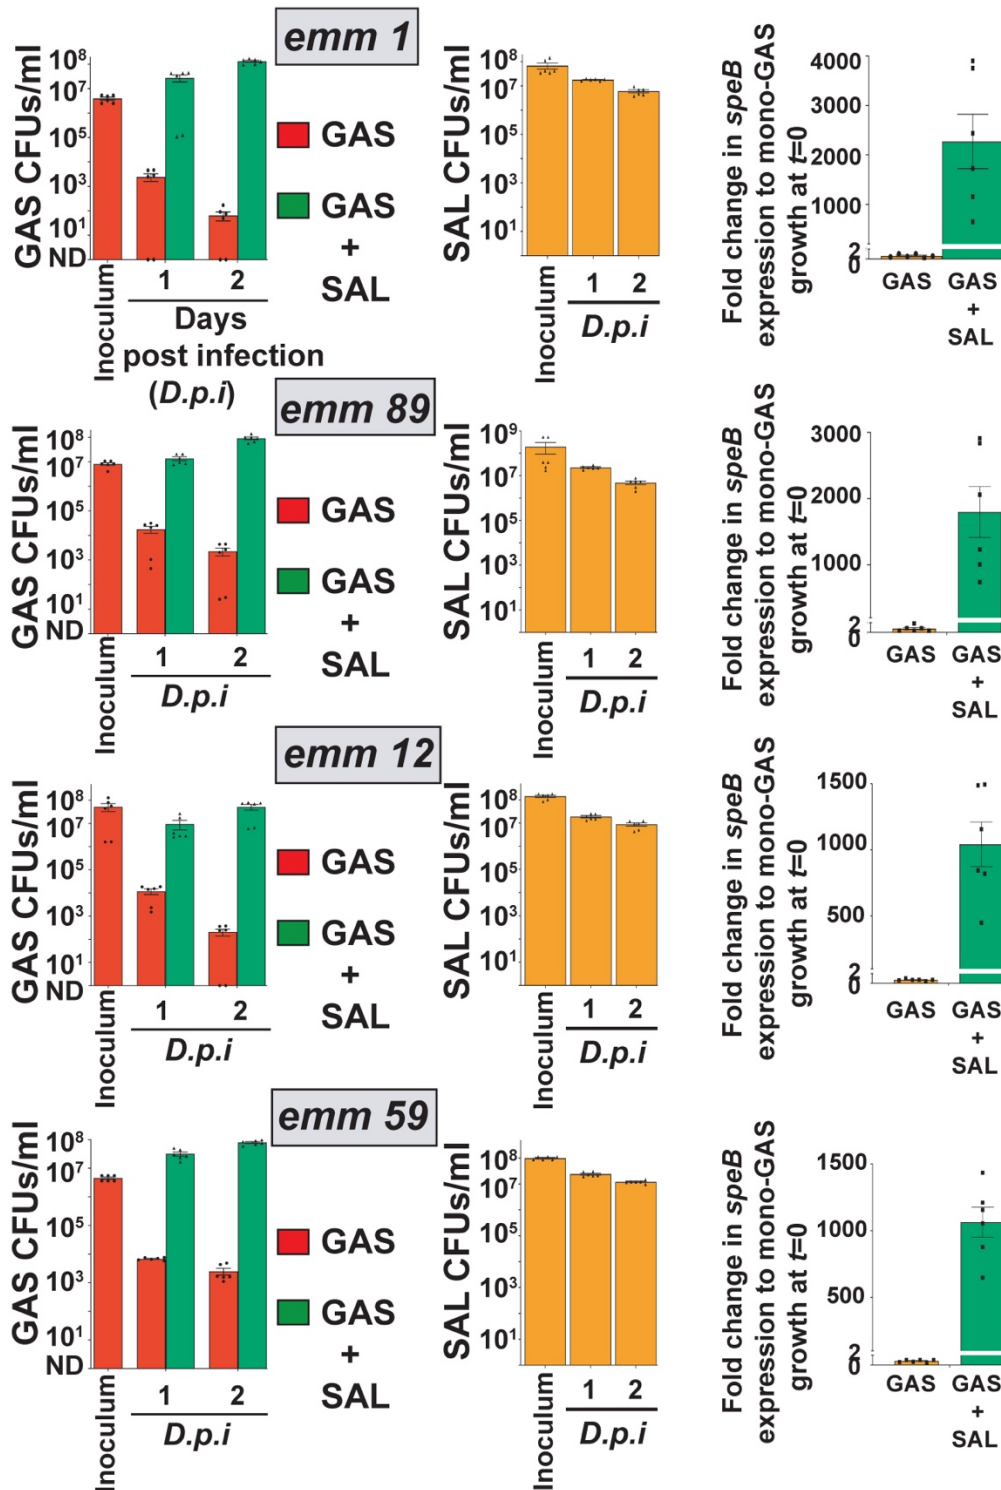

355

356 **Figure S16. SAL K12-GAS interactions are not strain specific.** GAS strains belong  
 357 to 4 distinct *emm* serotypes, *emm1*, *emm89*, *emm12*, and *emm59*, were grown in the  
 358 absence (GAS) or presence of SAL (GAS+SAL) in human saliva *ex vivo*. Samples  
 359 were collected at either 1 or 2 days post infection and bacterial burden was assessed

360 by enumerating colony-forming units (CFUs) per ml of saliva. GAS CFUs (left) and  
361 SAL CFUs (center) are shown. GAS was grown in the absence (GAS) or presence of  
362  $10^7$  CFUs/ml of SAL (GAS+SAL) in human saliva *ex vivo*. Samples were collected at  
363 the 24 hpi and assessed for *speB* expression by qRT-PCR (right). Experiment was  
364 performed as three biological replicates and analyzed in duplicate. Data graphed were  
365 mean  $\pm$  s.e.m.

366

367

368

369

370

371

372

373

374

375

376

377

378

379

380

381

382

383

384

385

386

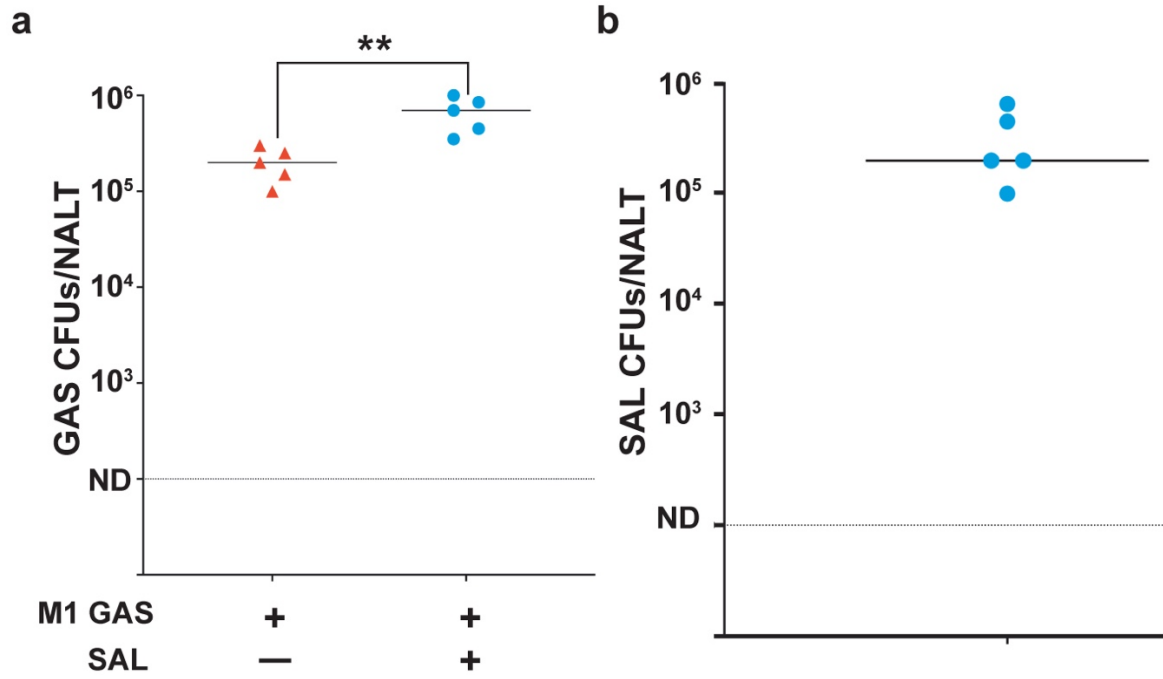

388

389 **Figure S17.** C57Bl/6 mice were inoculated intranasally with 10<sup>8</sup> CFUs of GAS and/or  
 390 SAL. Samples were collected at 24 h post-infection and CFUs of GAS (**a**) and SAL (**b**)  
 391 were enumerated. Data are pooled from two independent experiments and are  
 392 presented as the median. (*n*=5). *P* values were calculated by two-tailed Mann-Whitney  
 393 test. \*\*, *P* = 0.008.

394

395

396

397

398

399

400

401

402

403

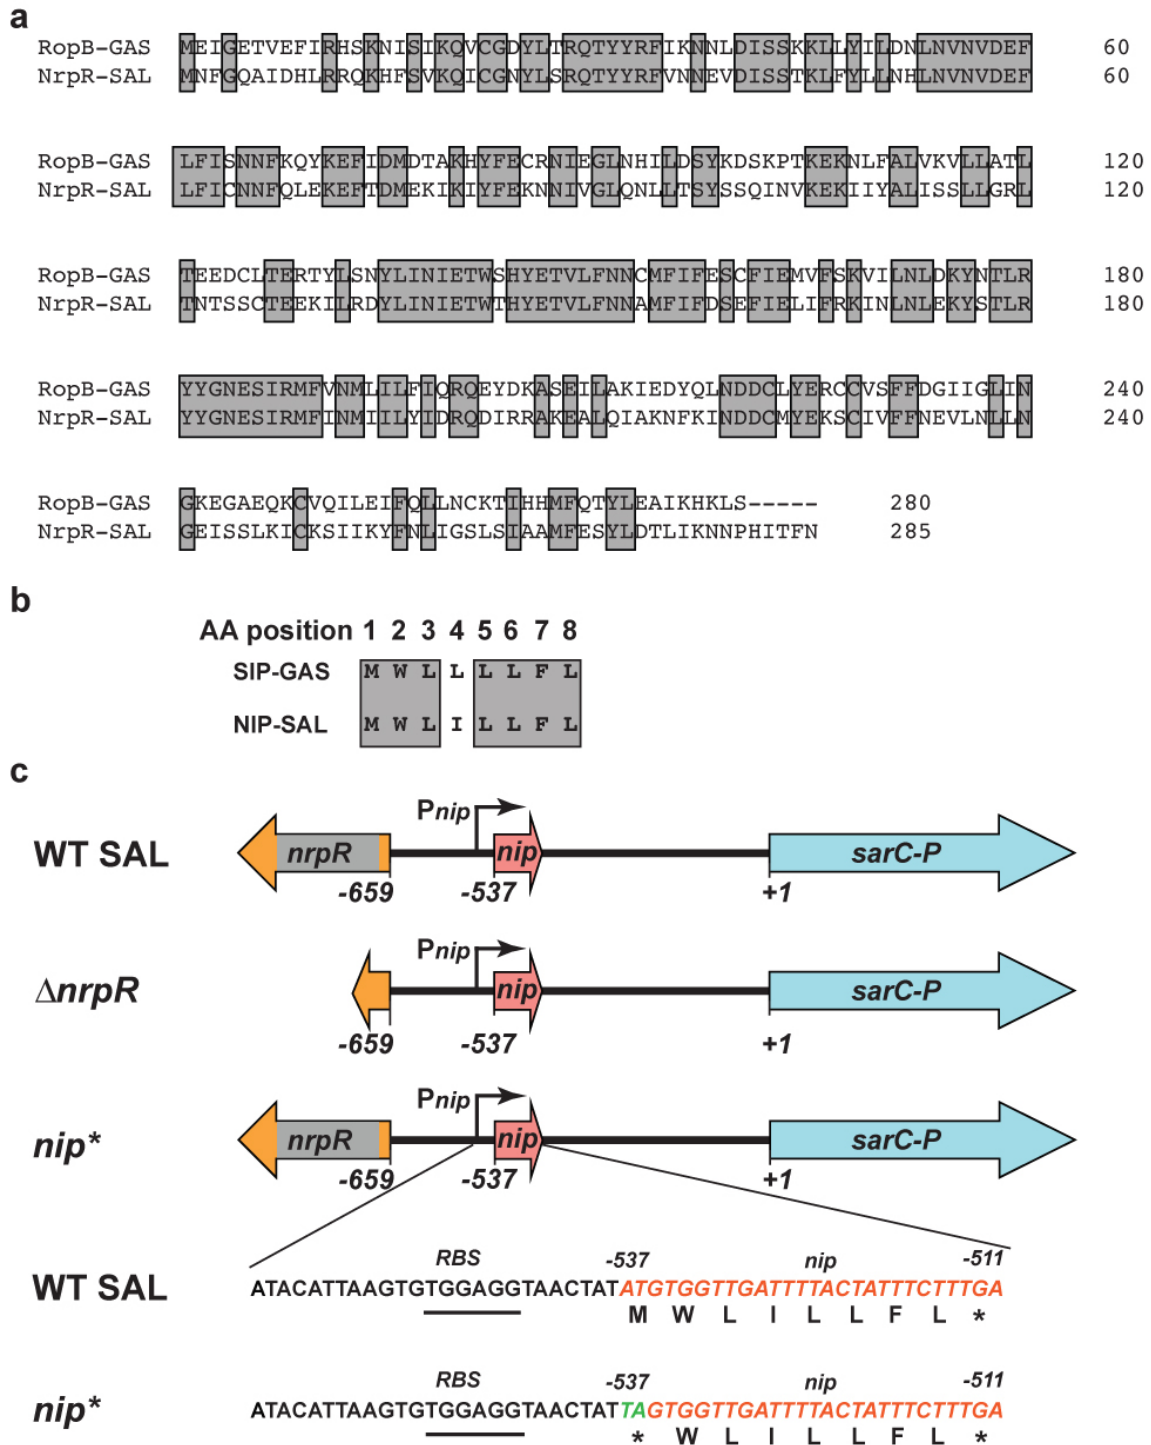

407 **Figure S18. Identification of NrpR-NIP signaling pathway in SAL that controls**  
 408 ***sar-BGC* expression.** **a**, Amino acid sequence alignment of RopB from GAS with  
 409 NrpR (SarA) from SAL. **b**, Amino acid sequence alignment of the leaderless  
 410 intercellular peptide signal SIP from GAS with NIP (SarB) from SAL. The identical



411 residues between aligned molecules are highlighted in shaded boxes. **c**, Schematics  
412 of the mutant strains used to characterize NrpR-NIP signaling pathway in SAL.  
413 Organization of genes encoding *nrpR* and *nip* located upstream of *sarC-P* coding  
414 region is shown. The numbers below the line indicate the nucleotide positions relative  
415 to the translation start site (+1) of *sarC*. Since *nip* is encoded as part of the promoter  
416 for *sarC-P* operon, a *nip\** mutation with the *nip* start codon (ATG) changed to stop  
417 codon (TAG) was constructed to disrupt *nip* translation but minimize the disruption of  
418 *sip/sarC-P* promoter ( $P_{sip}$ ) (bottom panel). The nucleotide sequences underlined  
419 indicate the putative ribosomal binding site for NIP.

420

421

422

423

424

425

426

427

428

429

430

431

432

433

434

435

436

437

438

| <b>Locus tag</b>  | <b>Predicted function</b>                       | <b>Fold change in <i>nip*</i> mutant</b> | <b>Fold change in <i>ΔnrpR</i> mutant</b> | <b>Protein ID</b> |
|-------------------|-------------------------------------------------|------------------------------------------|-------------------------------------------|-------------------|
| <i>RSSL_00024</i> | putative cytosolic protein                      | - 65.3015                                | - 70.24239                                | EJO15269.1        |
| <i>RSSL_00025</i> | NRPS-PKS                                        | - 66.32337                               | - 74.78175                                | EJO15270.1        |
| <i>RSSL_00026</i> | NRPS-PKS                                        | - 63.6474                                | - 66.95553                                | EJO15271.1        |
| <i>RSSL_00027</i> | Dehydratase                                     | - 55.13018                               | - 57.42981                                | EJO15272.1        |
| <i>RSSL_00028</i> | Ketoreductase                                   | - 56.32262                               | - 57.08425                                | EJO15273.1        |
| <i>RSSL_00029</i> | PKS                                             | - 43.61117                               | - 42.41811                                | EJO15274.1        |
| <i>RSSL_00030</i> | Thioesterase                                    | - 29.43982                               | - 27.61122                                | EJO15275.1        |
| <i>RSSL_00031</i> | Malonyl-CoA-(acyl-carrier protein) transacylase | - 36.27568                               | - 33.15989                                | EJO15276.1        |
| <i>RSSL_00032</i> | PPant transferase                               | - 29.88388                               | - 25.27362                                | EJO15277.1        |
| <i>RSSL_00033</i> | Transposase                                     | - 26.2434                                | - 26.95386                                | EJO15278.1        |
| <i>RSSL_00034</i> | Transposase                                     | - 25.36269                               | - 27.41807                                | EJO15279.1        |
| <i>RSSL_00035</i> | Integrase/recombinase xerD                      | - 20.23268                               | - 18.24736                                | EJO15281.1        |
| <i>RSSL_00036</i> | Hypothetical protein                            | - 18.24373                               | - 18.24736                                | EJO15281.1        |
| <i>RSSL_00037</i> | Hypothetical protein                            | - 18.09474                               | - 16.05297                                | EJO15282.1        |

|                   |                                   |            |            |            |
|-------------------|-----------------------------------|------------|------------|------------|
| <i>RSSL_00918</i> | hypothetical protein              | - 1.055825 | - 9.106906 | EJO15254.1 |
| <i>RSSL_01466</i> | BioY protein                      | - 3.344894 | - 3.373269 | EJO16816.1 |
| <i>RSSL_02192</i> | fructose-specific IIABC component | - 4.01602  | - 1.308663 | EJO16462.1 |
| <i>RSSL_02193</i> | 1-phosphofructokinase             | - 3.077222 | - 1.636629 | EJO16461.1 |

440 **Figure S19. Genes downregulated in  $\Delta nrpR$  or *nip\** mutant strain compared to**  
441 **WT SAL.**

442

443

444

445

446

447

448

449

450

451

452

453

454

455

456

457

458

459 Fig S20

| Locus tag         | Products             | Fold change in <i>nip*</i> mutant | Fold change in $\Delta nrpR$ mutant | Protein ID        |
|-------------------|----------------------|-----------------------------------|-------------------------------------|-------------------|
| <i>RSSL_00915</i> | <i>Phage protein</i> | 1.75507                           | 8.903858                            | <i>EJO15251.1</i> |

460 **Figure S20. Genes upregulated in  $\Delta nrpR$  or *nip\** mutant strain compared to WT**  
461 **SAL.**

462

463

464

465

466

467

468

469

470

471

472

473

474

475

476

477

478

479

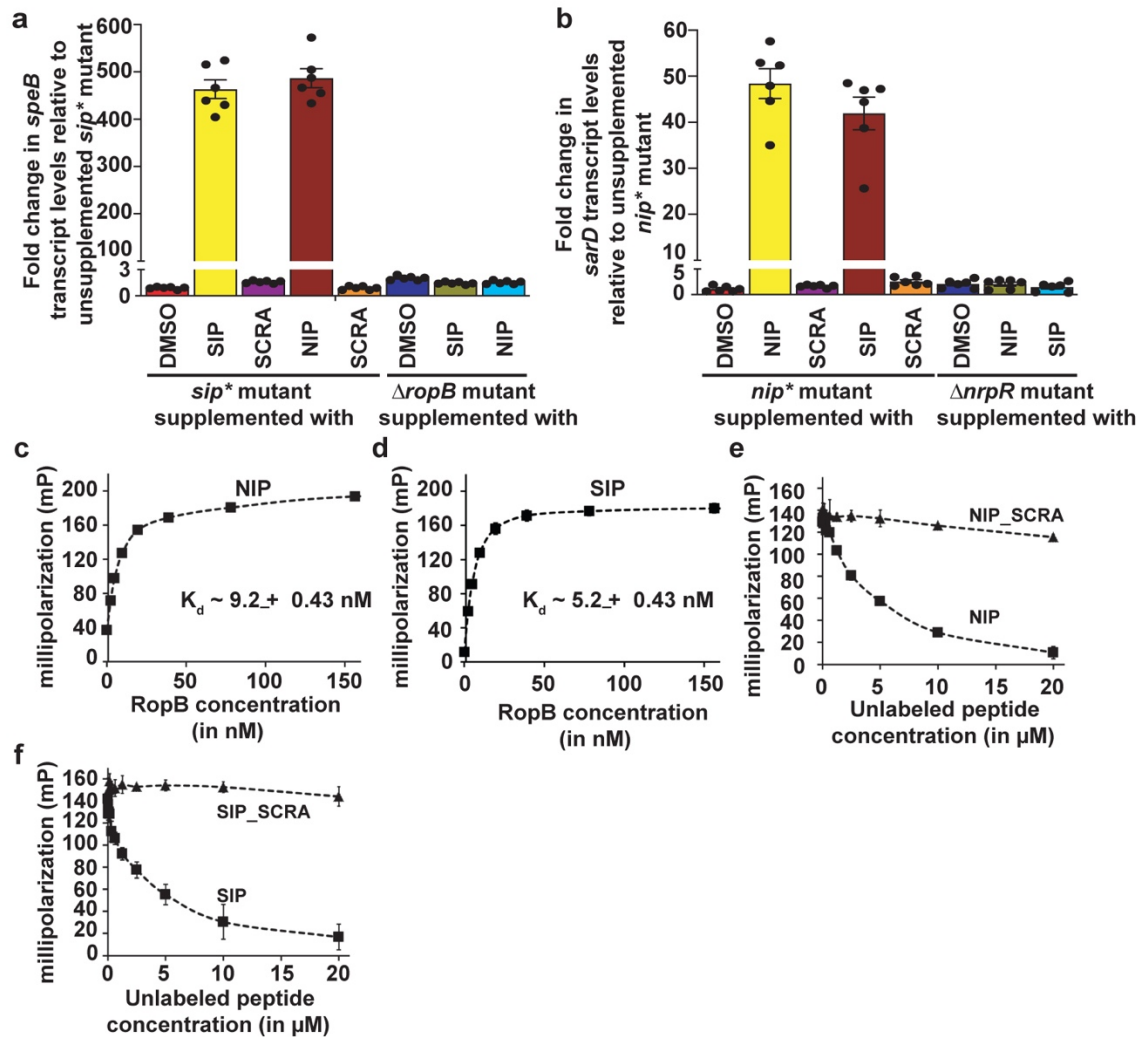

481

482 **Figure S21. Cross activation of heterologous SIP signaling pathway in GAS by**  
 483 **SAL-NIP.** Supplementation of either GAS-*sip\** (a) or SAL-*nip\** (b) mutant with  
 484 synthetic NIP or SIP, respectively, activate heterologous signaling pathways. a, The  
 485 GAS-*sip\** or GAS- $\Delta$ *ropB* mutant was grown to late-exponential phase of growth ( $A_{600}$   
 486  $\sim 1.5$ ) and supplemented with 100 nM of the indicated synthetic peptides. b, The  
 487 SAL-*nip\** or  $\Delta$ *nrpR* mutant was grown to mid-exponential phase of growth ( $A_{600}$   $\sim 2.0$ ) and  
 488 supplemented with 100 nM of the indicated synthetic peptides. After 1 h incubation,  
 489 cells were collected and transcript levels of *speB* or *sarD* were assessed by qRT-PCR.  
 490 Cells supplemented with the carrier, DMSO, that was used to dissolve peptides were  
 491 included as a control. Experiment was performed as three biological replicates and  
 492 analyzed in duplicate. Data graphed were mean  $\pm$  s.e.m. c, The affinity and direct  
 493 interactions between NIP and RopB was assessed by fluorescence polarization (FP)  
 494 assay and compared with RopB-SIP interactions (d). e, Ability of synthetic NIP or  
 495 SCRA peptide to disrupt pre-formed RopB-SIP complex was assessed by FP assay

496 and compared to that of synthetic SIP (f). Binding assays were done in three  
497 independent occasions. Data graphed were mean  $\pm$  s.e.m.

498

499

500

501

502

503

504

505

506

507

508

509

510

511

512

513

514

515

516

517

518

519

520

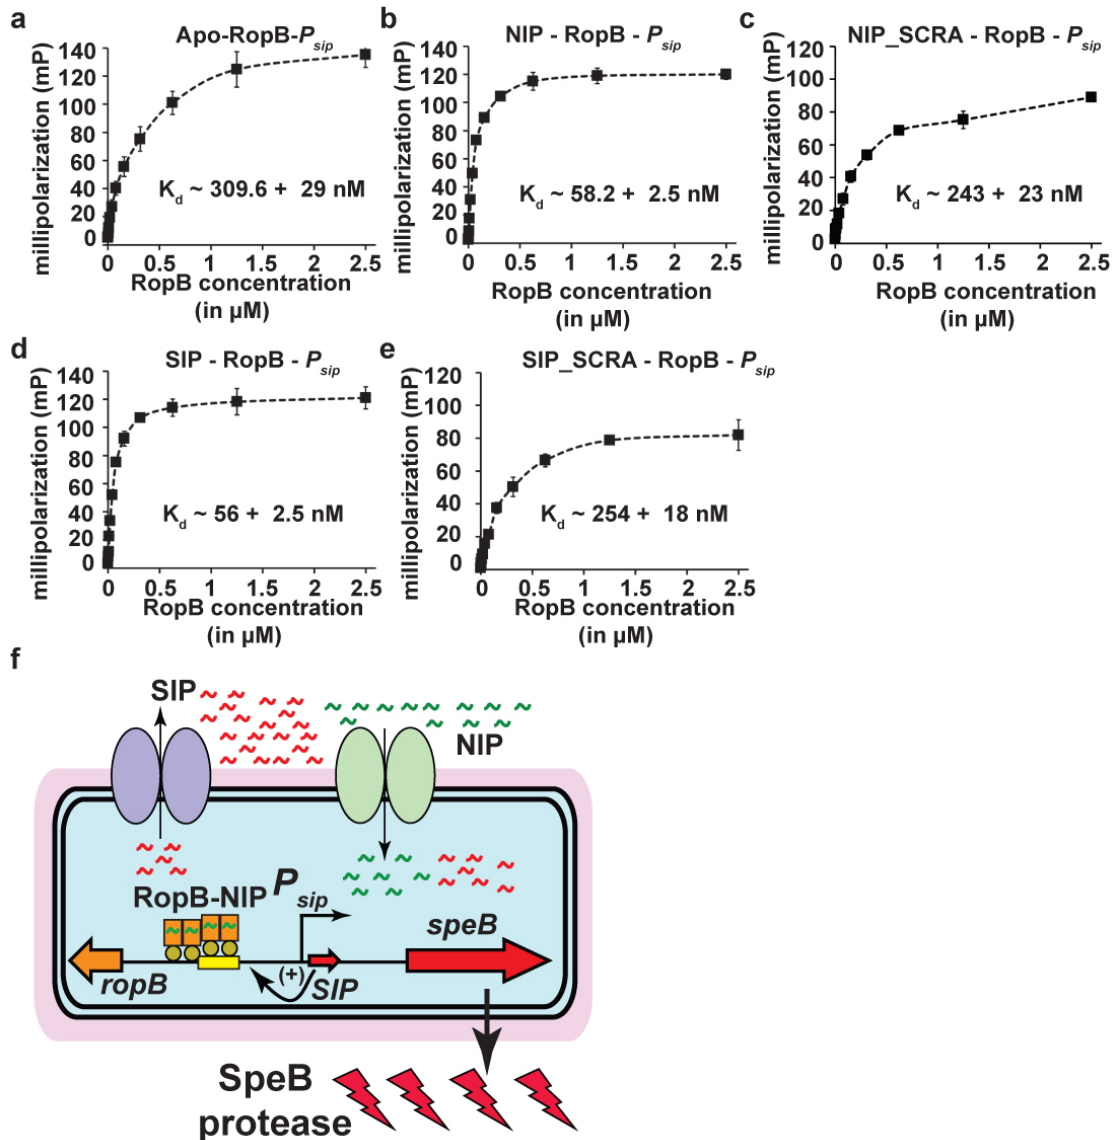

522

523 **Figure S22. NIP activates *speB* expression by promoting high affinity**  
 524 **interactions between RopB binding site in *sip* promoter ( $P_{sip}$ ) and RopB.**  
 525 Analyses of interactions between FITC-labeled oligoduplex containing RopB-binding  
 526 site and apo- (a) or NIP-bound (b) RopB by FP assay. The NIP-induced high affinity  
 527 interactions between RopB and  $P_{sip}$  were compared with scrambled NIP peptide (NIP-  
 528 SCRA) (c), SIP (d), and SIP-SCRA (e). Binding assays were done in three  
 529 independent occasions. Data graphed were mean  $\pm$  s.e.m. f, The proposed model for  
 530 *speB* upregulation by NIP via RopB-NIP interactions. NIP produced by SAL is hijacked  
 531 by GAS, which causes initial induction of *sip* and *speB* expression by facilitating high  
 532 affinity RopB-  $P_{sip}$  interactions. Subsequently, upregulation of endogenous *sip*  
 533 expression results in robust induction of *sip* and *speB* expression by a positive  
 534 feedback mechanism.

535 Fig S23

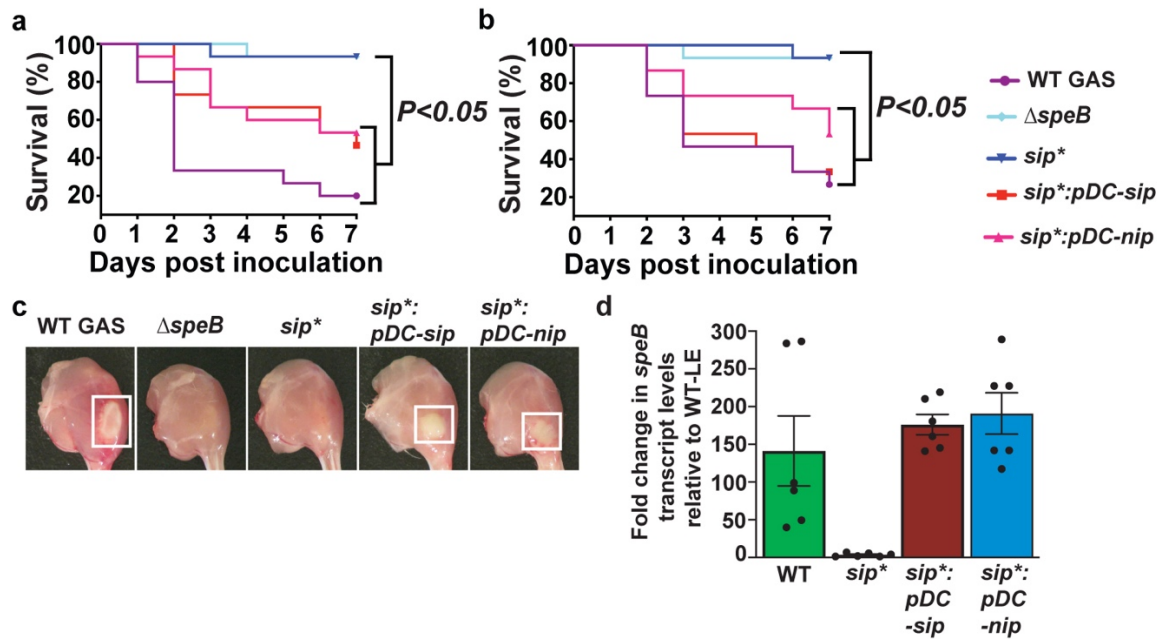

536

537 **Figure S23. NIP activates *speB* expression *in vivo* and contributes to GAS**  
 538 **virulence in mouse models of infection. a,** Fifteen outbred CD-1 mice were  
 539 inoculated intraperitoneally with each indicated strain. Kaplan-Meier survival curves  
 540 with *P* values derived by the log-rank test are shown. The *P* value between the groups  
 541 was  $< 0.0001$ . **b,** Fifteen outbred CD-1 mice per strain were injected intramuscularly  
 542 with each indicated strain. Kaplan-Meier survival curves with *P* values derived by the  
 543 log-rank test are shown. The *P* value between the groups was  $< 0.0001$ . **c,** Analyses  
 544 of gross hindlimb lesions from mice infected with each indicated strain. Larger lesions  
 545 with extensive tissue damage in mice infected with *speB*-expressing strains are boxed  
 546 (white box). **d,** Analyses of *speB* expression in intramuscular lesions isolated from  
 547 mice infected with the indicated strains. Samples were collected 48 h post infection  
 548 from five mice per strain and analyzed in triplicate. Data graphed as mean  $\pm$  s.e.m.

549

550

551

552

553

554

555



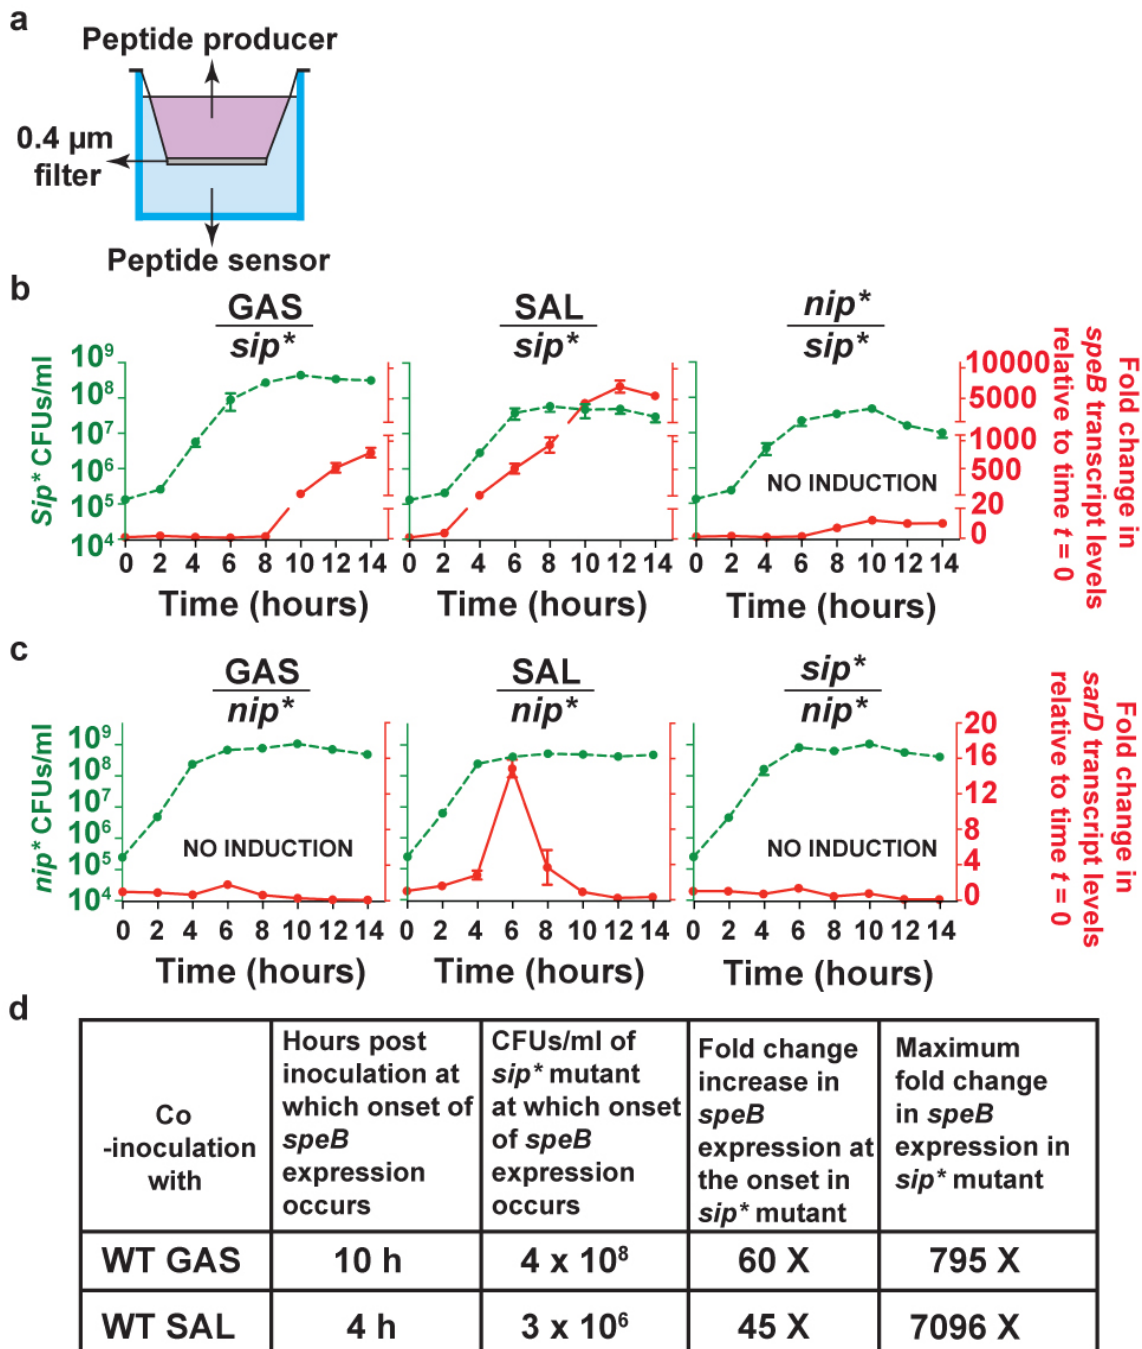

557

558 **Figure S24. GAS growth and *speB* transcript level kinetics during growth *in vitro***  
 559 **in the presence of GAS or SAL.** a, Schematic of trans-well is shown. b, The ability  
 560 of WT GAS or SAL to activate *speB* expression in the *sip\** mutant strain during co-  
 561 cultivation was assessed. The *sip\** mutant strain was inoculated at  $10^5$  CFUs/ml in the  
 562 bottom well. One of the following strains (WT GAS or WT SAL or SAL *nip\** mutant)  
 563 was inoculated at  $10^7$  CFUs/ml in the top well. c, The ability of WT GAS or SAL to  
 564 activate *sarD* expression in the *nip\** mutant strain during co-cultivation was assessed.  
 565 The *nip\** mutant ( $10^5$  CFUs/ml) strain was inoculated in the bottom well. One of the

566 following strains (WT GAS or WT SAL or GAS *sip*\* mutant) was inoculated in the top  
567 well at 10<sup>7</sup> CFUs/ml. The left y-axis represents the growth curve as determined by  
568 CFU analyses at the indicated time points. The right y-axis represents the fold change  
569 in *speB* or *sarD* transcript levels at the indicated time points, as measured by qRT-  
570 PCR. The fold change in transcript levels relative to the level in the starting culture  
571 (time point = 0 h) is shown. In. panels **b** and **c**, data from three biological replicates  
572 are shown and data graphed as mean ± s.e.m. **d**, Summary of data in panel B showing  
573 *speB* induction kinetics in the *sip*\* mutant strain grown in the presence of WT GAS or  
574 WT SAL.

575

576

577

578

579

580

581

582

583

584

585

586

587

588

589

590

591

592

593

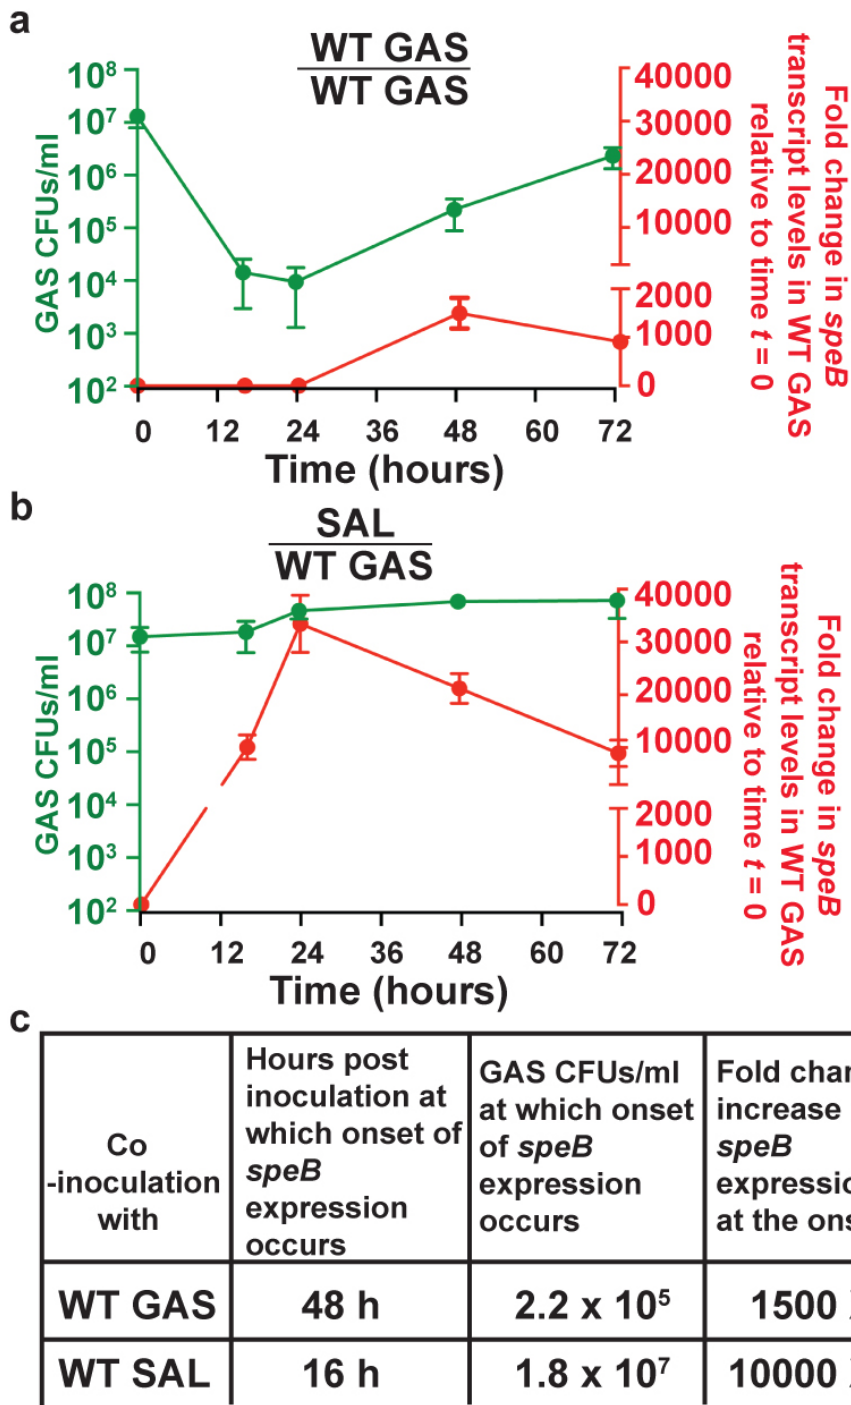

595

596 **Figure S25. GAS growth and *speB* transcript level kinetics during growth *ex vivo***  
 597 **in the presence of GAS or SAL in human saliva.** The ability of WT GAS (a) or SAL  
 598 (b) to activate *speB* expression in WT GAS during co-cultivation in human saliva was  
 599 assessed. Since *speB*-negative GAS strains are defective in survival in human saliva,  
 600 we used WT GAS as the indicator strain in saliva studies. The WT GAS was inoculated  
 601 at  $10^7$  CFUs/ml in the bottom well. WT GAS (a) or SAL (b) was inoculated in the top

602 well at  $10^7$  CFUs/ml. The left y-axis represents the growth curve as determined by  
603 CFU analyses at the indicated time points. The right y-axis represents the fold change  
604 in *speB* transcript levels at the indicated time points, as measured by qRT-PCR. The  
605 fold change in transcript levels relative to the level in the starting culture (time point =  
606 0 h) is shown. Data from three biological replicates are shown. Data graphed as mean  
607  $\pm$  s.e.m. **c**, Summary of data in panel A and B showing *speB* induction kinetics in WT  
608 GAS grown in the presence of WT GAS or WT SAL.

609

610

611

612

613

614

615

616

617

618

619

620

621

622

623

624

625

626

627

628

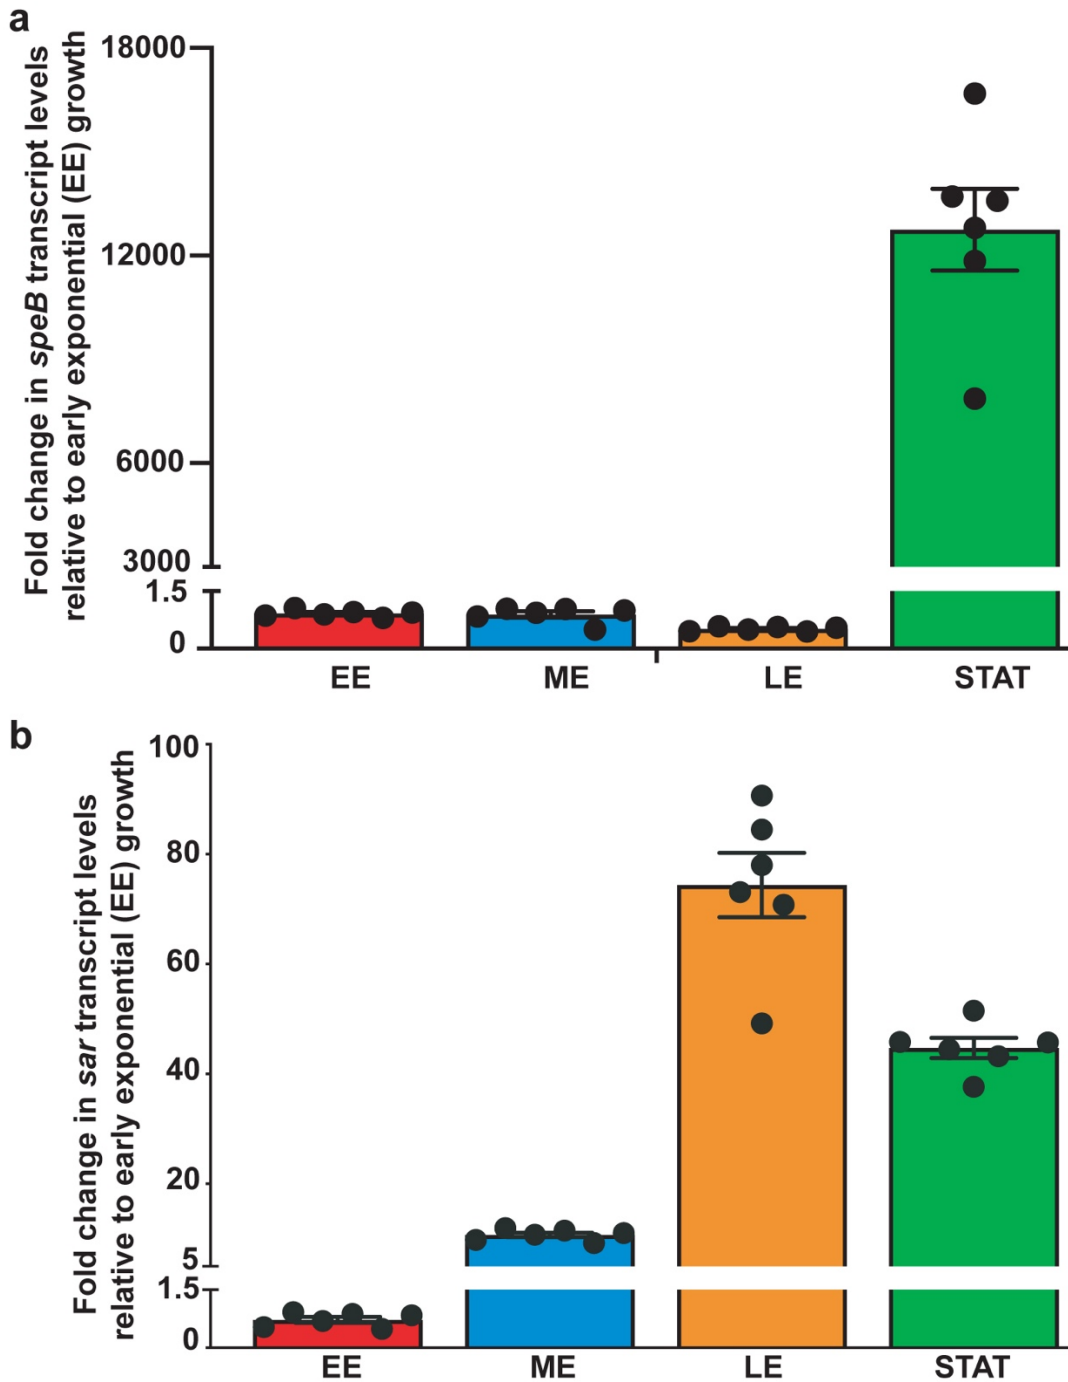

630

631 **Figure S26. Growth phase-dependent and -independent expression of *speB* (a)**  
 632 **and *sarD* (b) in GAS and SAL, respectively.** Three biological replicates were grown  
 633 on separate occasions and samples were collected at the indicated phases of  
 634 bacterial growth. Transcript levels were assessed by qRT-PCR and analyzed in  
 635 duplicate. Fold change in transcript levels relative to early exponential phase (EE)  
 636 phase of growth is shown. EE – early exponential, ME – mid exponential, LE – late

637 exponential, and STAT – stationary phase of bacterial growth. Data graphed as mean  
638  $\pm$  s.e.m.

639

640

641

642

643

644

645

646

647

648

649

650

651

652

653

654

655

656

657

658

659

660

661

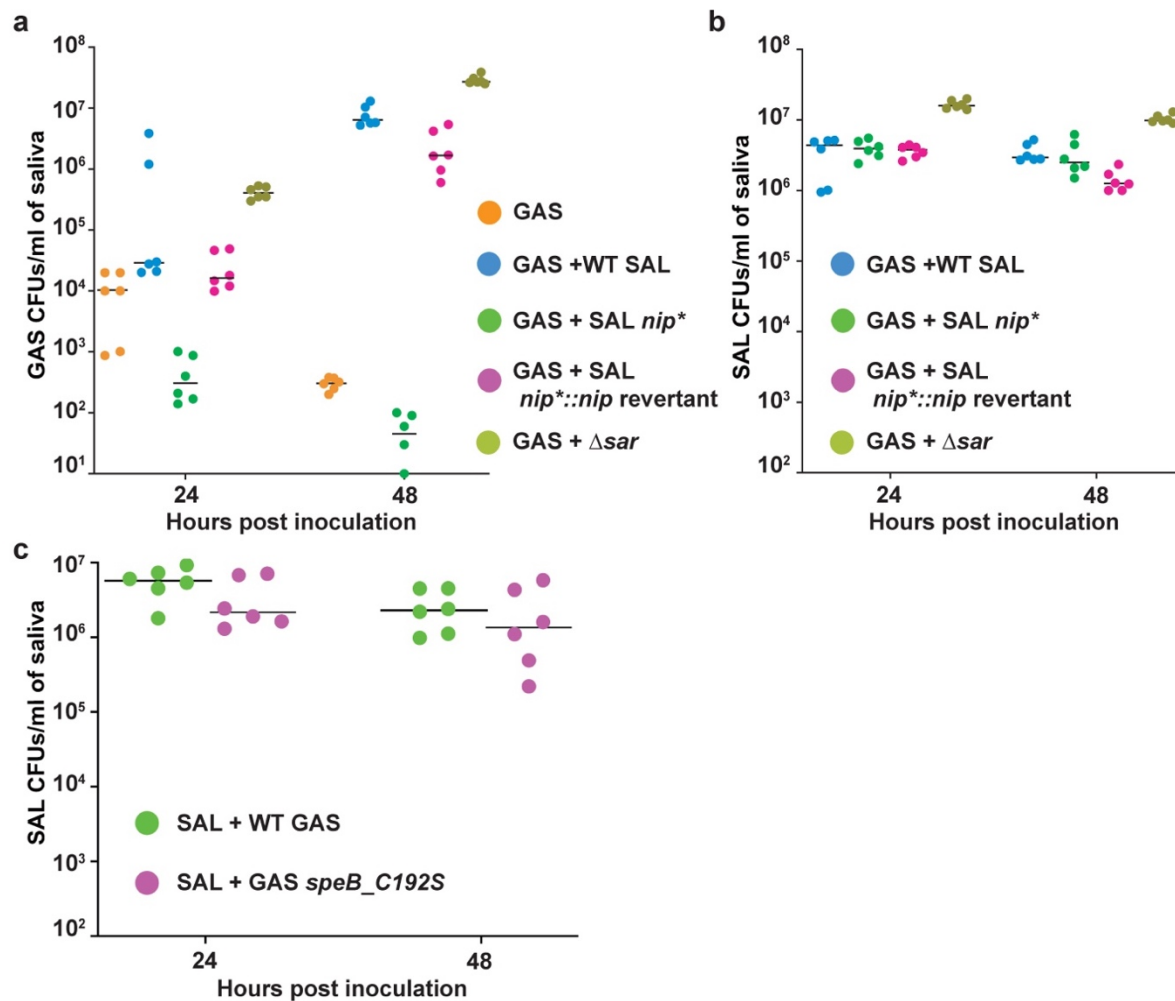

663

664 **Figure S27. GAS and SAL levels in saliva during co-cultivation with GAS.** **a**, The  
 665 levels of indicated GAS strains in human saliva during co-cultivation with SAL *ex vivo*.  
 666 **b**, The levels of indicated SAL strains in human saliva during dual species growth *ex vivo*  
 667 *ex vivo* with GAS. **c**, SAL levels in human saliva during dual species growth *ex vivo* with  
 668 either WT GAS or GAS *speB\_C192S* mutant strain. Bacterial burden was assessed  
 669 by CFU analyses. Experiments were performed as biological triplicates and analyzed  
 670 in duplicate. No statistical significance between groups were detected by Kruskal-  
 671 Wallis analyses.

672

673

674

675

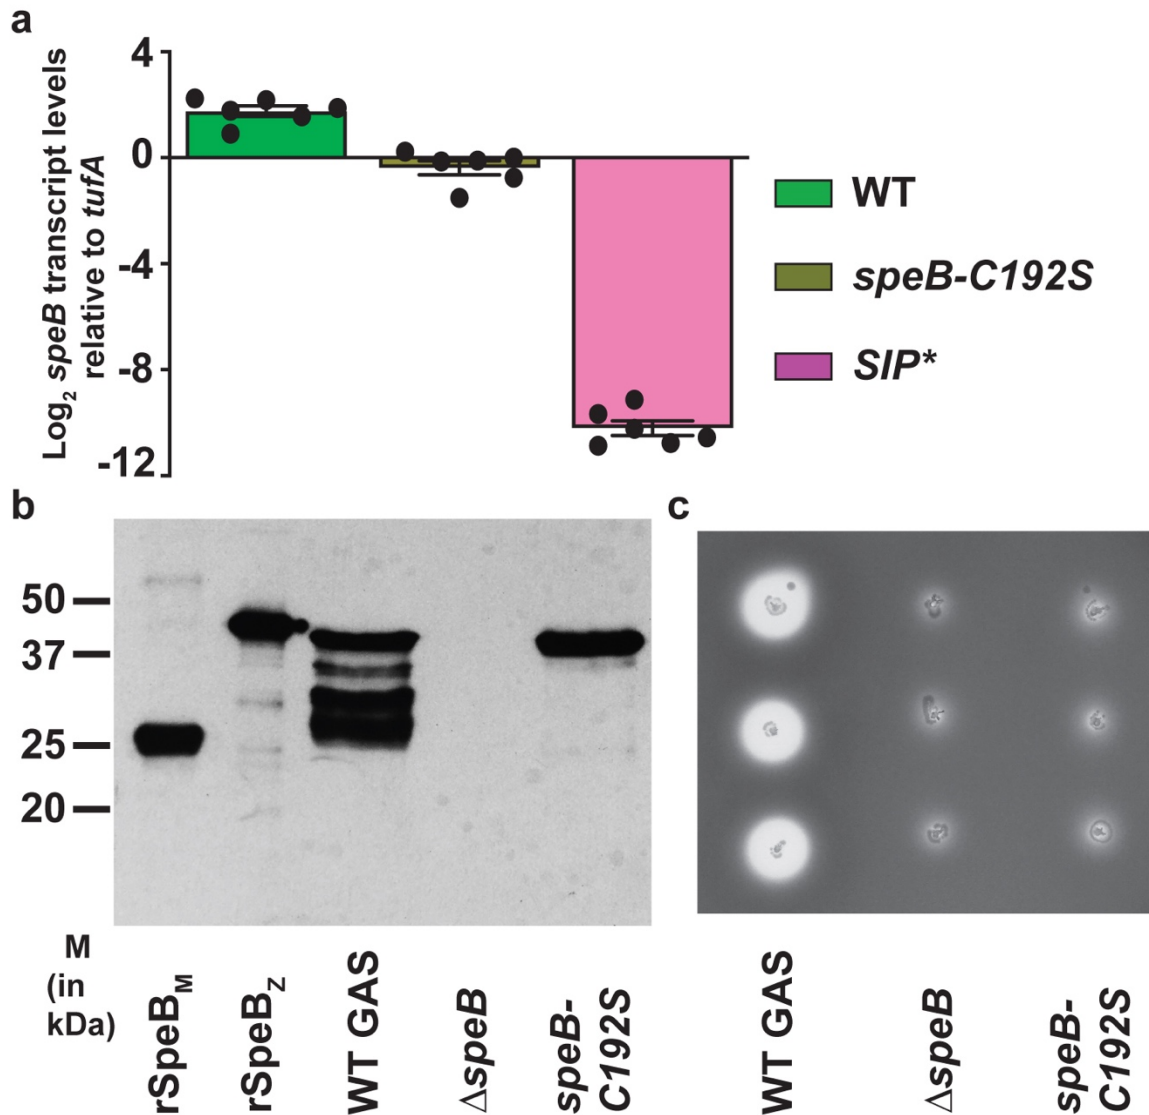

677

678 **Figure S28.** The expression of *speB* was unaffected in the GAS mutant strain  
 679 encoding catalytically inactive *speB-C192S* mutant (a) but extracellular autocatalytic  
 680 processing of SpeB zymogen to mature SpeB in the secretome (b), and corresponding  
 681 SpeB protease activity (c) were affected. a) Cells were grown in laboratory medium to  
 682 stationary phase of growth. Samples were collected and *speB* transcript levels were  
 683 assessed by qRT-PCR. The log-fold changes in *speB* transcript levels relative to  
 684 house-keeping gene *tufA* are shown. Experiments were performed as biological  
 685 triplicates and analyzed in duplicate and data were presented as mean ± s.e.m. b,  
 686 Immunoblot analyses of cell-free culture supernatant obtained from the indicated  
 687 strains for the presence of secreted SpeB. rSpeB<sub>M</sub> – purified recombinant mature  
 688 SpeB; rSpeB<sub>Z</sub> – purified recombinant zymogen form of SpeB. Multiple bands in the



689 culture supernatant from WT GAS indicate the intermediate forms of SpeB arising  
690 from autocatalytic maturation process from zymogen to mature form. The catalytically  
691 inactive *speB-C192S* mutant does not undergo autocatalytic maturation steps, which  
692 is supported by the presence of only the zymogen form of SpeB in the culture  
693 supernatant from the *speB-C192S* mutant strain. Three independent experiments  
694 were performed and representative blot is shown. **c**, Milk plate clearing assay to  
695 demonstrate lack of SpeB protease activity in *speB-C192S* mutant strain. Protease  
696 activity was determined by the presence of a clear zone around the bacterial growth.

697

698

699

700

701

702

703

704

705

706

707

708

709

710

711

712

713

714

715

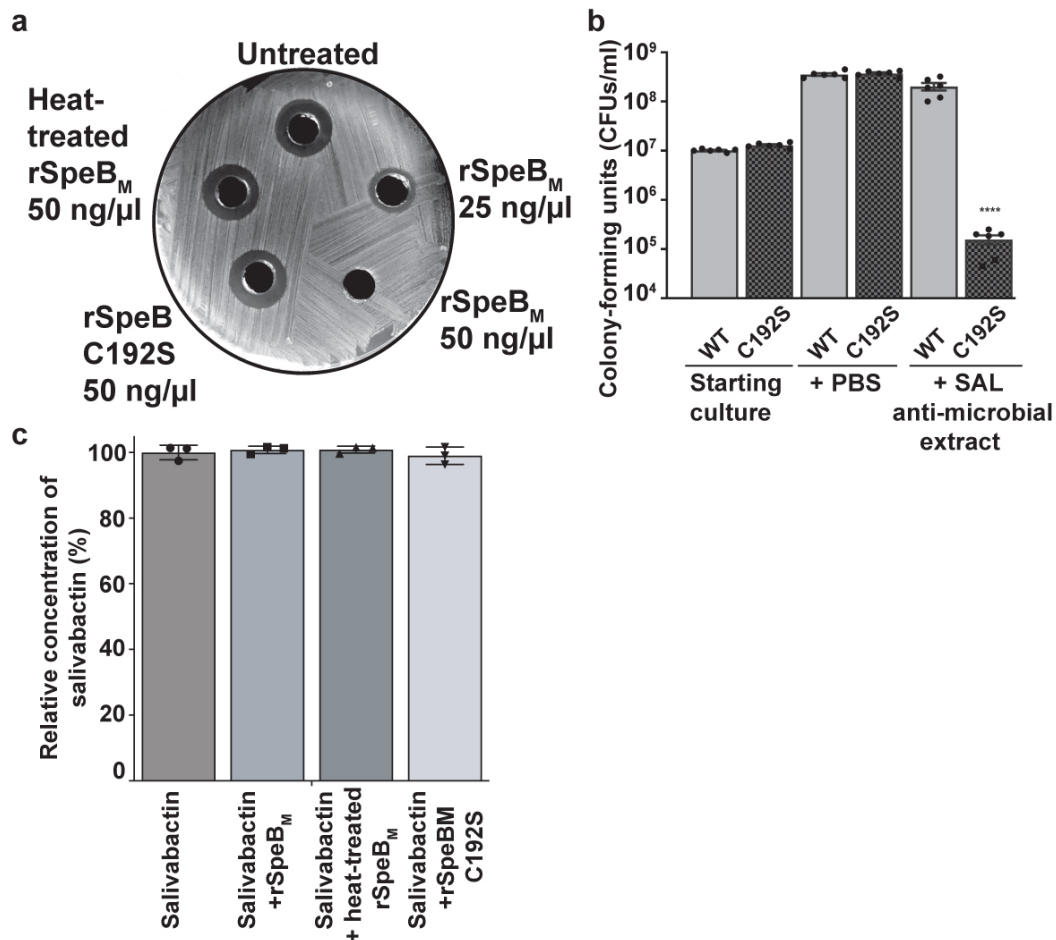718 **F**

719 **Figure S29. SpeB degrades SAL lantibiotics and aids GAS survival but unable to**  
 720 **degrade salivabactin. a,** Incubation of SAL lantibiotics with enzymatically active  
 721 SpeB protease resulted in loss of anti-GAS activity. SAL was grown on agar plates  
 722 overnight at 37°C and SAL growth was scraped off the plate surface. The SAL growth  
 723 was frozen and thawed at room temperature. The supernatant containing lantibiotic  
 724 extracts was separated by centrifugation at 3000 rpm for 10 minutes and used to test  
 725 the antimicrobial activity. The clarified supernatant was incubated with indicated  
 726 concentrations of purified recombinant WT SpeB<sub>M</sub> or C192S<sub>M</sub> at 37°C for 2 h. GAS  
 727 lawn was swabbed on an agar plate and SpeB-treated or untreated SAL lantibiotic  
 728 extracts were placed in wells in the agar plate. Heat-treated rSpeB<sub>M</sub> was prepared by  
 729 heating rSpeB<sub>M</sub> at 90°C for 5 minutes. The presence of zone of clearance around the  
 730 wells indicates the presence of antimicrobial activity. **b,** The enzymatically inactive  
 731 *speB*-C192S mutant strain is more sensitive to SAL lantibiotic extracts compared to  
 732 WT GAS. The WT GAS or *speB*\_C192S mutant strain was either mock treated with

733 PBS or treated with SAL lantibiotic extracts for 2 h at 37°C. Cells were collected,  
734 serially diluted and plated. The sensitivity to lantibiotic extracts was assessed by  
735 enumerating colony-forming units. The experiment was performed in triplicates and  
736 analyzed in duplicate. Data graphed were mean  $\pm$  s.e.m. *P* value (\*\*\*\* - *P* < 0.0001)  
737 was determined by two-tailed Mann Whitney test. **c**, Salivabactin is insensitive to the  
738 protease activity of recombinant WT SpeB. Salivabactin was incubated with rSpeB<sub>M</sub>,  
739 heat-treated rSpeB<sub>M</sub>, or enzymatically inactive rC192S<sub>M</sub>. The relative abundance of  
740 salivabactin from different treatments were compared, based on the extracted ion  
741 chromatograms. Data are shown as mean  $\pm$  s.d. (*n* = 3).

742

743

744

745

746

747

748

749

750

751

752

753

754

755

756

757

758

759

760

761 Fig S30

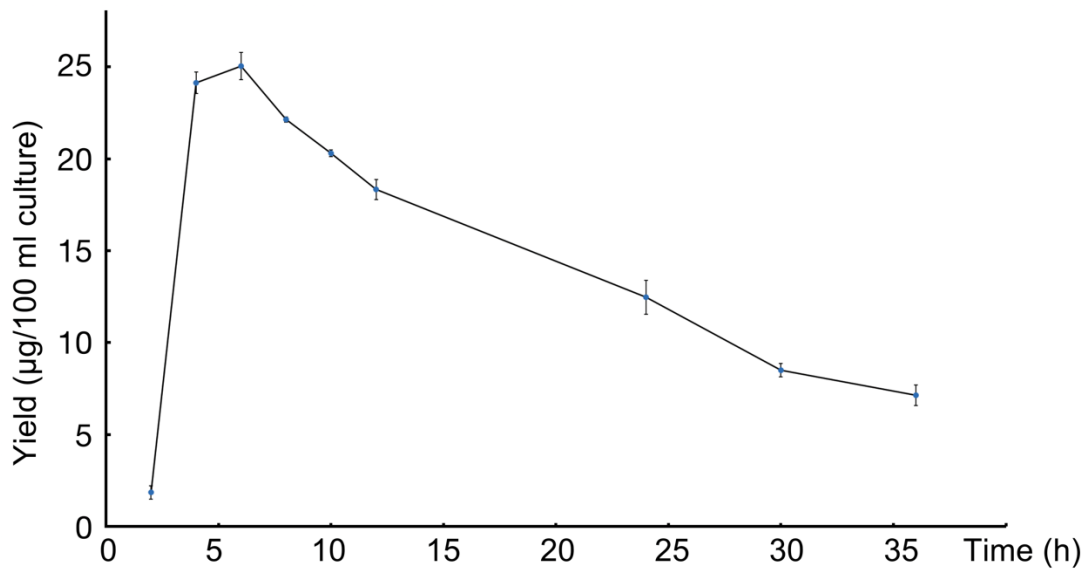

762

763

764 **Figure S30. Time course for the production of salivabactin by SAL during growth**  
765 ***in vitro***. The WT SAL was grown in THY broth (Todd-Hewitt broth + 3 g/L yeast extract)  
766 at 37 °C and the cultures were extracted by organic solvent and analyzed by HPLC  
767 MS. Experiments were performed as biological triplicates and data are shown as  
768 mean ± s.d.

769

770

771

772

773

774

775

776

777

778

779

780

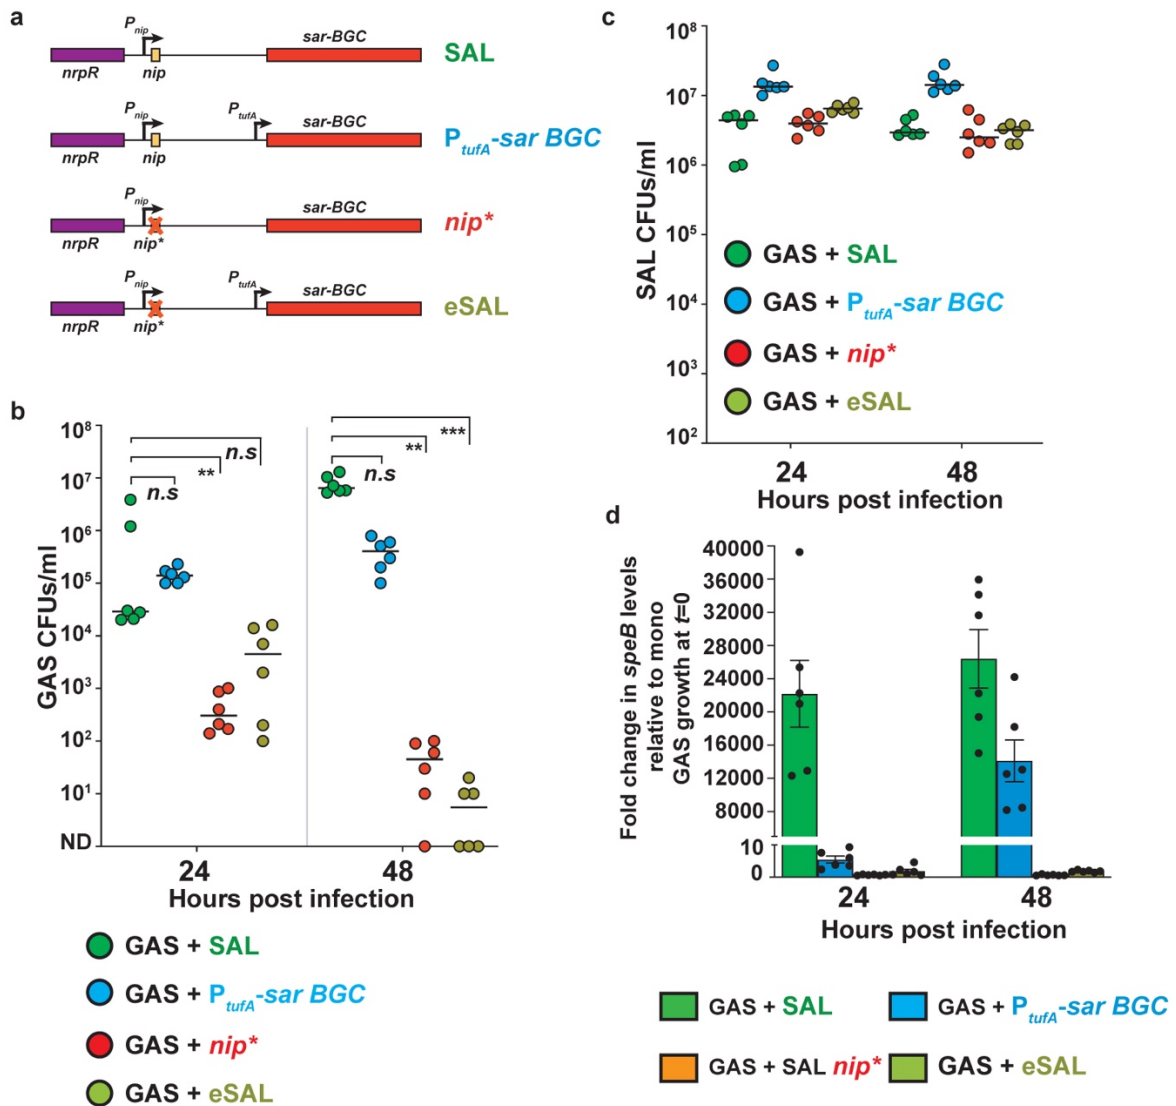

782

783 **Figure S31. The *nip*\* mutation has more pronounced role in GAS growth**  
 784 **inhibition than constitutive expression of *sar-BGC*.** Characterization of the two  
 785 single modifications in eSAL (a) for GAS growth promotion (b), SAL survival (c), and  
 786 *speB* expression (d) in human saliva *ex vivo*. Experiments were performed as  
 787 biological triplicates and analyzed in duplicate. In panels b and d, GAS + WT SAL  
 788 group as reference, and statistical significance was analyzed by multiple comparison  
 789 Kruskal-Wallis test. At 24 hpi, \*\*,  $P = 0.008$ , whereas at 48 hpi, \*\*,  $P = 0.002$ , and \*\*\*,  
 790  $P = 0.0002$ , n.s, not significant. In panel d, data were presented as mean ± s.e.m. In  
 791 panel c, a multiple comparison Kruskal-Wallis test was performed to determine  
 792 statistically significant differences compared to GAS infected with WT SAL as  
 793 reference group. No statistically significant differences in GAS CFUs between  
 794 individual groups and reference group were observed.

795

796

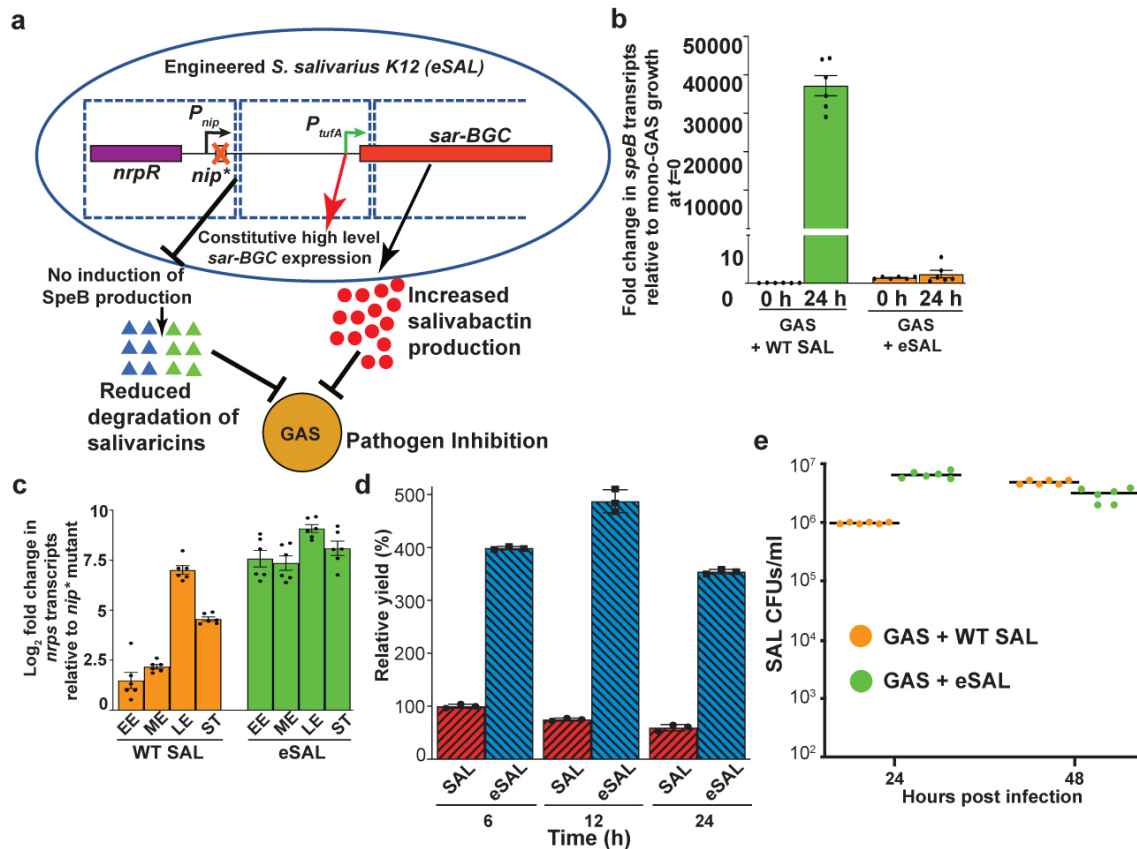

798

799 **Figure S32. a**, Schematics of genetic modifications in engineered *S. salivarius* (eSAL).  
 800 The *nip\** mutation was introduced to abolish NIP production in *S. salivarius* and early  
 801 induction of SpeB production in GAS during dual species growth. Transcription of *sar*  
 802 operon was coupled with constitutively active *P<sub>tufA</sub>* promoter that drives high level  
 803 growth phase-independent *sar-BGC* expression. Delayed SpeB protease production  
 804 is likely to disarm pathogen defense and result in increased salivarinic levels due to  
 805 reduced degradation by SpeB. Collectively, increased salivarinic and salivabactin  
 806 levels may lead to improved pathogen inhibition and clearance of GAS in the host. **b**,  
 807 The eSAL failed to induce *speB* expression during dual species growth in human  
 808 saliva. Transcript levels of *speB* in GAS grown in human saliva in the presence of SAL  
 809 or eSAL were compared. Fold change in *speB* transcript levels relative to mono  
 810 species GAS growth at  $t=0$  h is shown. **c**, Comparison of *sarD* expression profile  
 811 between WT *S. salivarius* and eSAL during different phases of bacterial growth in  
 812 laboratory medium. EE – early exponential phase ( $A_{600} \sim 0.5$ ); ME – mid-exponential  
 813 phase ( $A_{600} \sim 1.0$ ); LE -late-exponential phase ( $A_{600} \sim 2.0$ ); and ST – stationary phase  
 814 of growth ( $A_{600} \sim 3.0$ ). In panels **b** and **c**, data were presented as mean  $\pm$  s.e.m. **d**,  
 815 Production of salivabactin by WT SAL (red) and eSAL (blue). The WT SAL and eSAL  
 816 were grown in THY broth (Todd-Hewitt broth + 3 g/L yeast extract) at 37°C. Three

817 independent cultures collected at indicated time points were extracted by organic  
818 solvent and analyzed by HPLC–MS. Data are shown as mean  $\pm$  s.d. ( $n = 3$ ). **e**, The  
819 levels of SAL or eSAL during growth in the presence GAS in saliva, as assessed by  
820 CFU analyses. In panels **b**, **c**, and **e**, data were derived from biological triplicates.

821

822

823

824

825

826

827

828

829

830

831

832

833

834

835

836

837

838

839

840

841

842

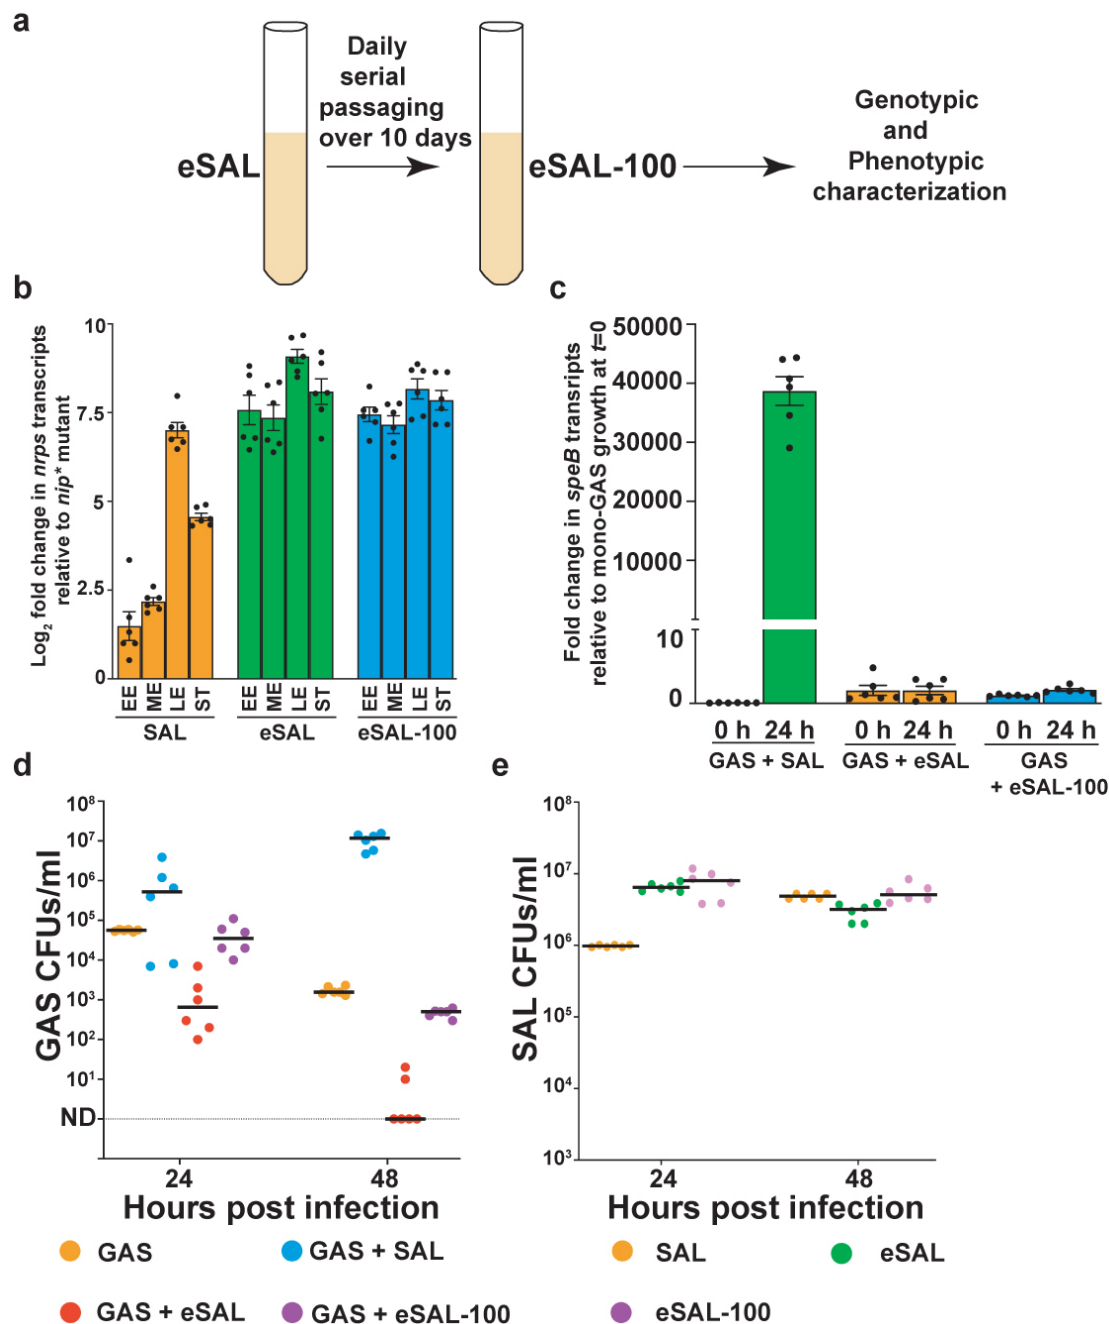



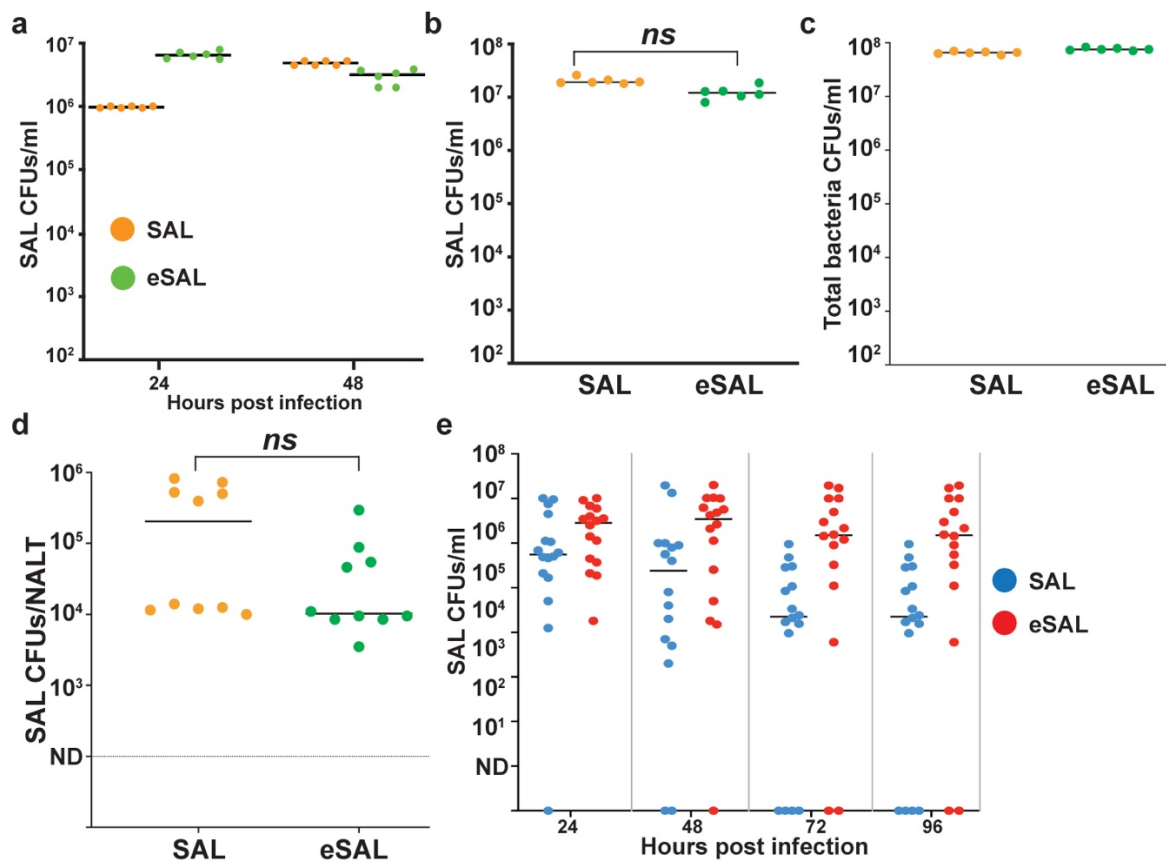

854

855 **Figure S34. The engineered modifications did not affect the fitness of eSAL.** SAL  
 856 or eSAL was inoculated at  $10^7$  CFUs/ml in sterile (a) or non-sterile (b) human saliva  
 857 with intact salivary microbiome and SAL levels were assessed by enumerating CFUs  
 858 in samples collected at the indicated time points. Total bacterial count in non-sterile  
 859 saliva (c) is shown. Three independent growth collected at indicated time points were  
 860 used. Mice ( $n = 10$  per group) were injected with  $10^8$  CFUs/ml of SAL or eSAL either  
 861 intranasally (d) or intravaginally (e). The NALTs were collected at 24 hpi from mice  
 862 infected intranasally, whereas the vaginal lumen was swabbed at the indicated time  
 863 points in mice infected intravaginally. SAL burden was assessed by CFU analyses.  
 864 Data were presented as mean  $\pm$  s.e.m. In all panels, a two-tailed Mann Whitney test  
 865 was performed to determine statistically significant differences between samples. No  
 866 statistically significant differences in CFUs between groups were observed.

867

868

869

870

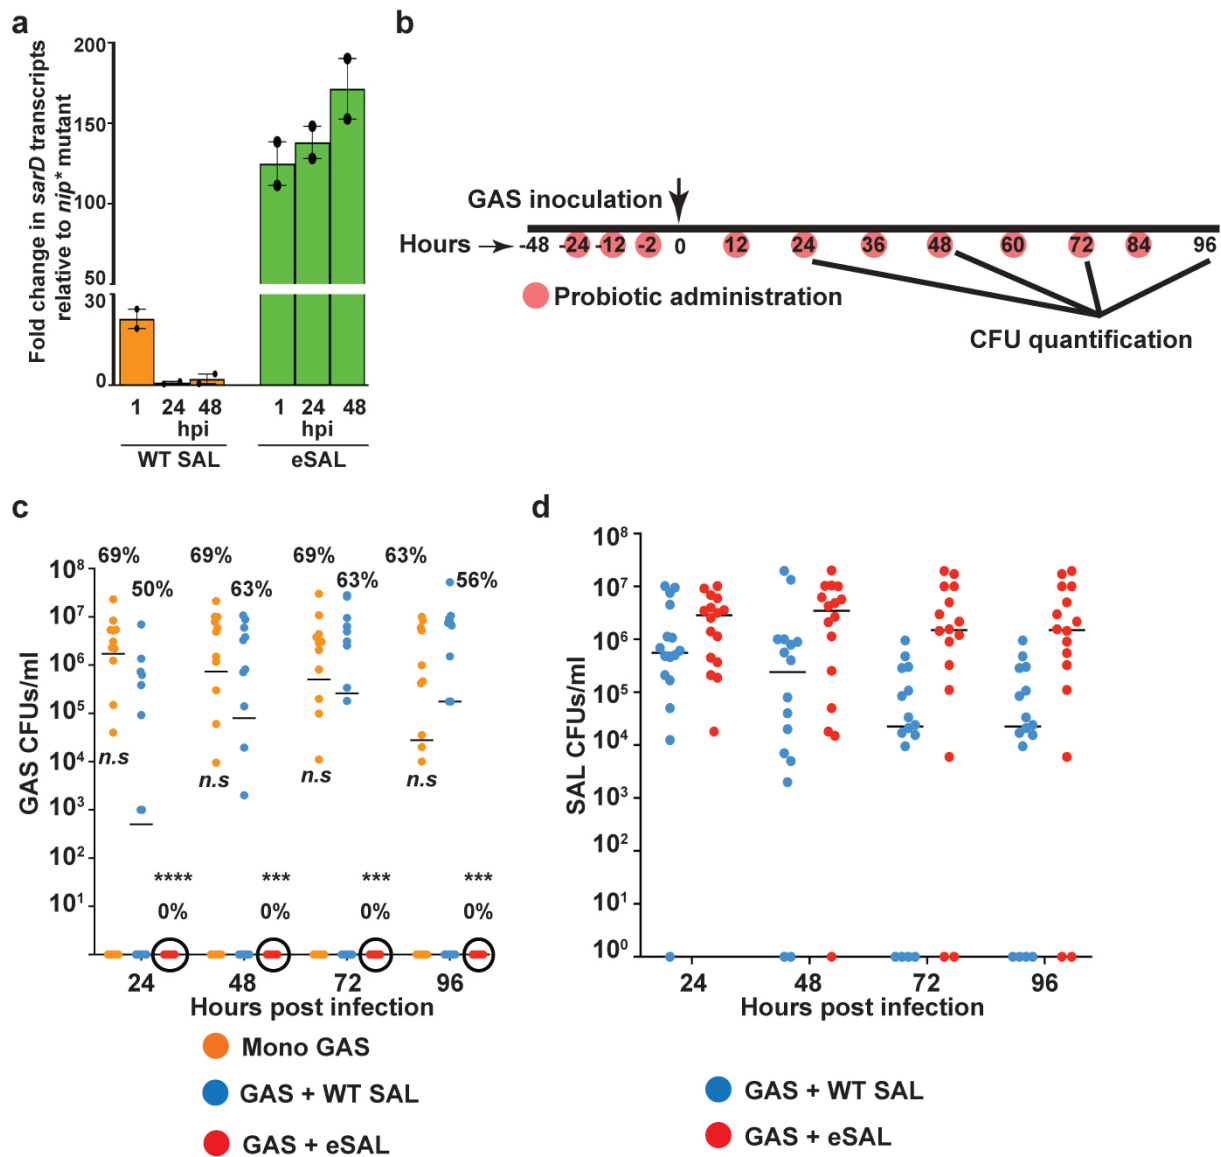

872

873 **Figure S35. The eSAL is effective in preventing long term vaginal mucosal GAS**  
 874 **colonization.** **a**, Mice ( $n=10$  mice/group) were given either WT SAL or eSAL  
 875 intravaginally and *sarD* levels were assessed at the indicated time points by qRT-PCR.  
 876 Pooled samples from each group ( $n=10$  per group) were used for RNA extraction and  
 877 transcript level analyses. Samples were analyzed in duplicate and data were  
 878 presented as mean  $\pm$  s.e.m. **b**, Experimental design to assess the probiotic efficacy of  
 879 eSAL. Mice ( $n=16$  mice/group) were given either WT SAL or eSAL at 12 h intervals.  
 880 eSAL was more efficacious than WT SAL in preventing GAS colonization in mouse  
 881 vaginal lumen. Each group ( $n=16$  mice/group) received  $10^8$  CFUs of either WT SAL  
 882 or eSAL intravaginally at the indicated time points. One day after the first dose of  
 883 probiotic administration, single dose ( $10^3$  CFUs) of GAS was given intravaginally.  
 884 Swabs were collected at the indicated time points. GAS (**c**) and SAL (**d**) burden was

885 assessed by CFU analyses. The circles indicate the lack of detectable GAS colonies  
886 in eSAL-treated group. The numbers on the top indicate the percentage of animals  
887 colonized by GAS in each group. In panel **c**, statistical significance was analyzed by  
888 two-tailed Mann-Whitney test. \*\*,  $P<0.01$ , \*\*\*\*,  $P<0.0001$ , *n.s.*, not significant.

889

890

891

892

893

894

895

896

897

898

899

900

901

902

903

904

905

906

907

908

909

910

911 Figure S36

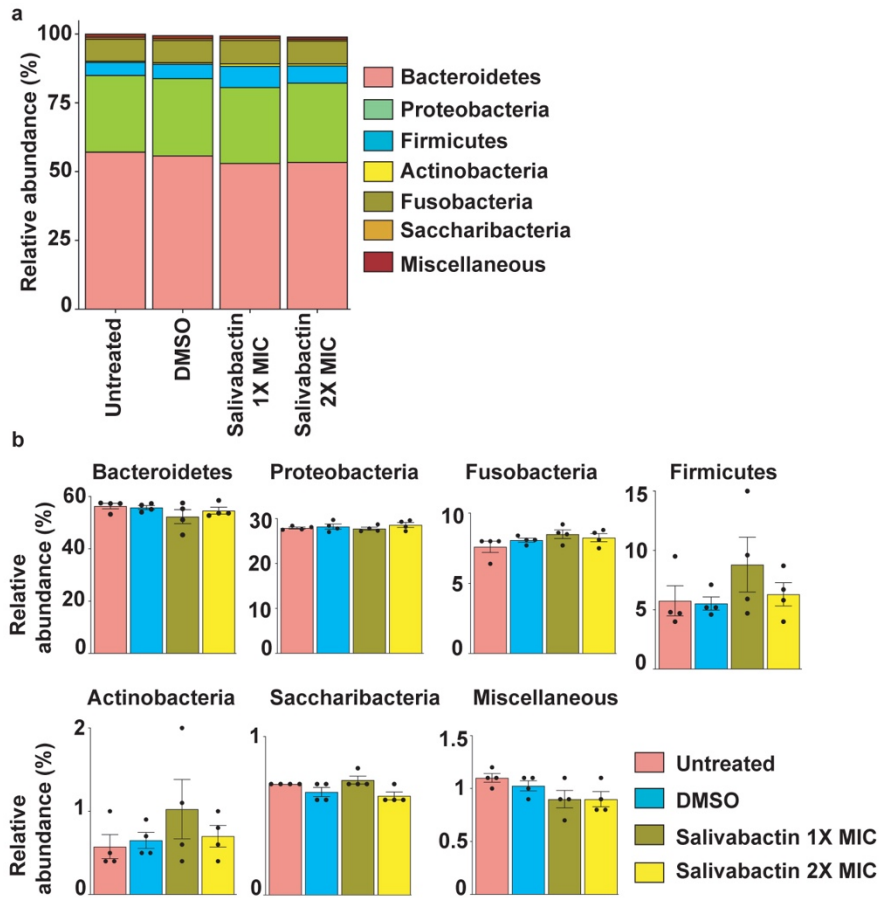

912

913

914 **Figure S36. Salivabactin treatment did not cause dysbiosis of salivary**  
915 **microbiome. a**, Saliva was collected from 4 healthy donors. Each sample was treated  
916 with one of the following for 16 h: DMSO, purified salivabactin at 1X MIC, and  
917 salivabactin at 2X MIC. Relative abundance of bacteria taxa at phylum level is shown.  
918 **b**, Relative abundance of individual phylum among the samples is shown. Samples  
919 collected from 4 individuals were treated as biological replicates and each replicate  
920 was analyzed in triplicate. Data were presented as mean  $\pm$  s.e.m. No statistical  
921 significance was found among the samples. A multiple comparison Kruskal-Wallis test  
922 was performed to determine statistically significant differences compared to untreated  
923 group.

924

925

926

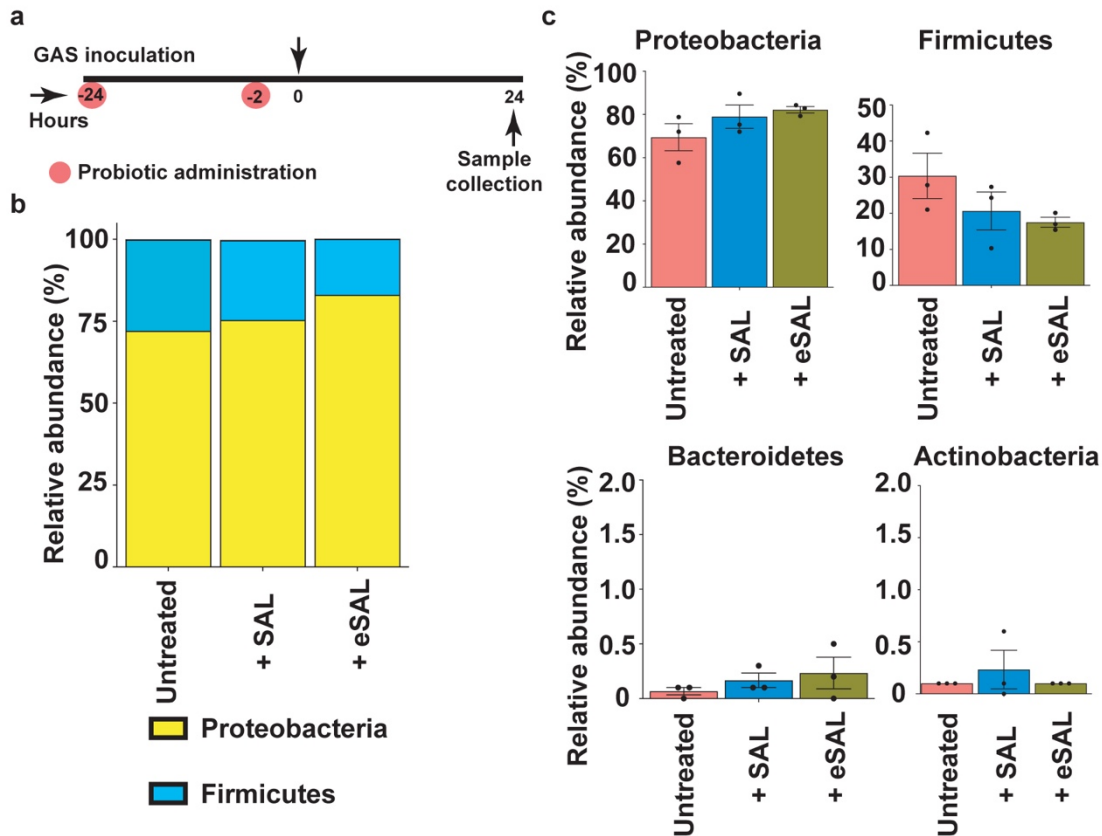

928

929 **Figure S37. Probiotic treatment with SAL or eSAL did not cause dysbiosis of**  
 930 **murine nasopharyngeal microbiome.** **a**, Experimental design for the administration  
 931 of SAL or eSAL. Mice ( $n=3$  mice/group) were given  $10^8$  CFUs of either SAL or eSAL  
 932 intranasally at the indicated time points. The nasopharyngeal swabs were collected at  
 933 the indicated time points and processed for microbiota composition by 16S rRNA  
 934 analyses. **b**, Relative abundance of bacteria taxa at phylum level is shown. **c**, Relative  
 935 abundance of individual phylum among the samples is shown. Data were presented  
 936 as mean  $\pm$  s.e.m. A multiple comparison Kruskal-Wallis test was performed to  
 937 determine statistically significant differences compared to untreated group. No  
 938 statistically significant differences were found among the samples.

939

940

941

942

943

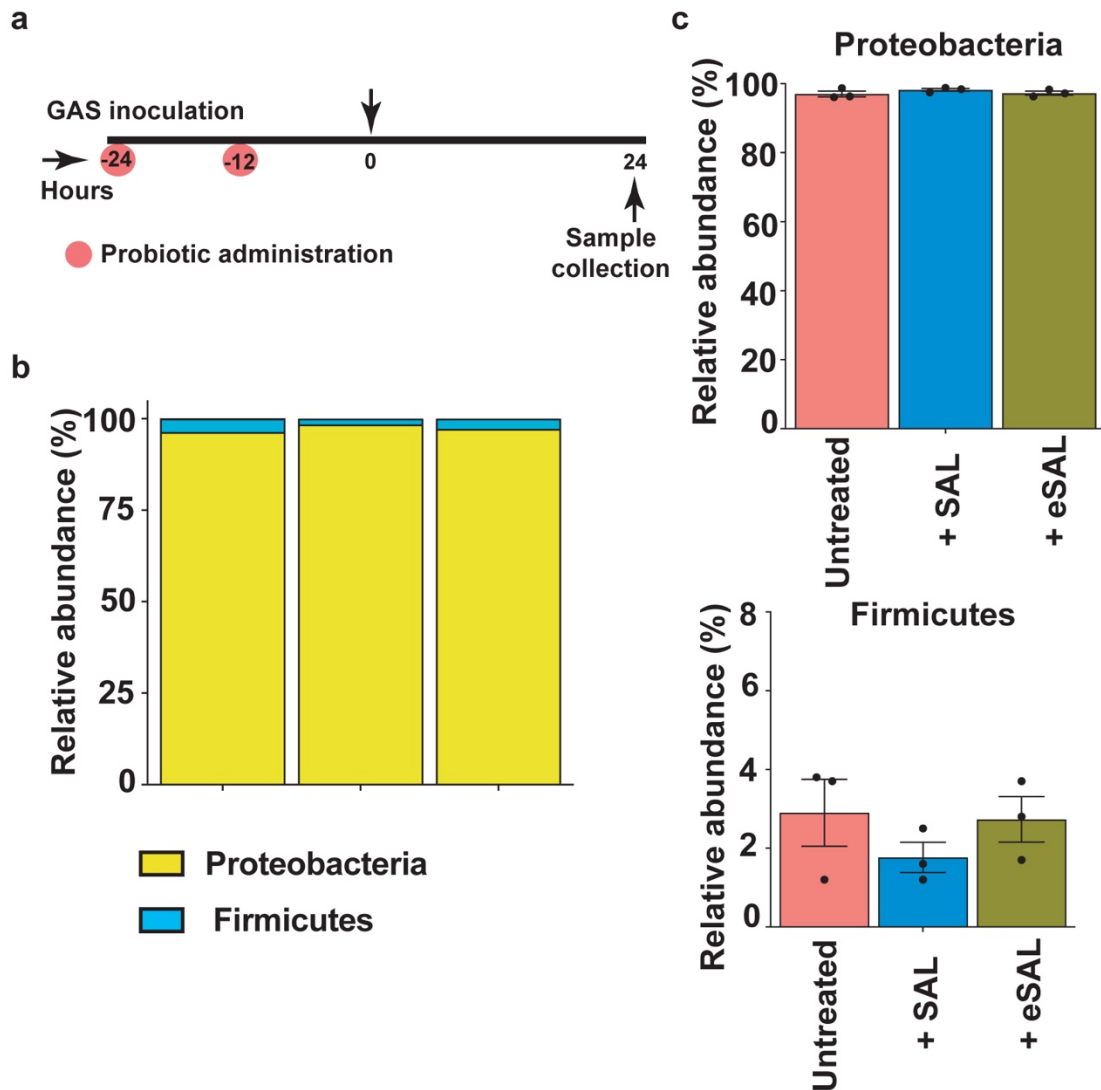

945

946 **Figure S38. Probiotic treatment with SAL or eSAL did not cause dysbiosis of**  
 947 **murine vaginal microbiome. a**, Experimental design for the administration of SAL or  
 948 eSAL. Mice ( $n=3$  mice/group) were given  $10^8$  CFUs of either SAL or eSAL  
 949 intravaginally at the indicated time points. The vaginal swabs were collected at the  
 950 indicated time points and processed for microbiota composition by 16S rRNA analyses.  
 951 **b**, Relative abundance of bacteria taxa at phylum level is shown. **c**, Relative  
 952 abundance of individual phylum among the samples is shown. Data were presented  
 953 as mean  $\pm$  s.e.m. A multiple comparison Kruskal-Wallis test was performed to  
 954 determine statistically significant differences compared to untreated group. No  
 955 statistically significant differences were found among the samples.

956

**Table S1. Bacterial strains and plasmids used in this study**

| Strain or Plasmid | Description                                                                                                     | Reference  |
|-------------------|-----------------------------------------------------------------------------------------------------------------|------------|
| <b>Strains</b>    |                                                                                                                 |            |
| WT GAS            | Invasive isolate MGAS10870, serotype M3                                                                         | 3          |
| MGAS2221          | Invasive isolate, serotype M1                                                                                   | 4          |
| MGAS15249         | Invasive isolate, serotype M59                                                                                  | 5          |
| MGAS26844         | Pharyngeal isolate, M89                                                                                         | 6          |
| MGAS9429          | Pharyngeal isolate, M12                                                                                         | 7          |
| $\Delta ropB$     | MGAS10870 $\Delta ropB::aad9$                                                                                   | 8          |
| $\Delta speB$     | MGAS10870 $\Delta speB::aad9$                                                                                   | 8          |
| <i>Sip*</i>       | Mutant strain that has the start codon of <i>sip</i> changed to stop codon in MGAS10870                         | 9          |
| <i>speB_C192S</i> | Mutant strain that has the catalytic residue Cys192 replaced with catalytically inactive Cys192Ser in MGAS10870 | This study |
| WT SAL            | <i>Streptococcus salivarius</i> K12<br>ATCC strain number BAA-1024                                              | 10         |

|                                             |                                                                                                                                                                                     |            |
|---------------------------------------------|-------------------------------------------------------------------------------------------------------------------------------------------------------------------------------------|------------|
| SAL marker                                  | WT SAL containing erythromycin resistance marker at locus RSSL_00112 encoding a hypothetical protein of unknown function                                                            | This study |
| <i>nip*</i>                                 | Mutant strain that has the start codon of <i>nip</i> ( <i>sarB</i> ) changed to stop codon in WT SAL                                                                                | This study |
| <i>nip*::<i>nip</i></i>                     | Revertant strain in which the stop codon introduced in the <i>nip*</i> mutant strain was reversed to start codon                                                                    | This study |
| $\Delta$ <i>nrpR</i>                        | Mutant strain that has the <i>nrpR</i> ( <i>sarA</i> ) coding region inactivated by marker less deletion in WT SAL                                                                  | This study |
| $\Delta$ <i>nrpR</i> :: <i>nrpR</i>         | Revertant strain in which the <i>nrpR</i> coding region was reintroduced in the $\Delta$ <i>nrpR</i> mutant strain                                                                  | This study |
| $\Delta$ <i>salAB</i>                       | Mutant strain that has <i>salA</i> and <i>salB</i> genes inactivated by marker less deletion                                                                                        | This study |
| $\Delta$ <i>sar</i>                         | Mutant strain that has the entire <i>sarC-P</i> BGC inactivated by replacement with chloramphenicol resistance marker                                                               | This study |
| $\Delta$ <i>salAB</i> / $\Delta$ <i>sar</i> | Mutant strain that has the deletion of <i>salA</i> , <i>salB</i> , and <i>sarC-P</i> genes                                                                                          | This study |
| <i>E. coli</i> DH5 $\alpha$                 | Host strain for cloning purposes                                                                                                                                                    |            |
| <i>E. coli</i> BL21(DE3)                    | Host strain for protein overexpression, <i>F</i> -, <i>ompT</i> , <i>hsdSB</i> ( <i>rB-mB</i> -), <i>gal</i> ( $\lambda$ <i>c I 857</i> , <i>ind1</i> , <i>Sam7</i> , <i>nin5</i> , |            |



|                 |                                                                                                                                                                                    |         |
|-----------------|------------------------------------------------------------------------------------------------------------------------------------------------------------------------------------|---------|
|                 | <i>lacUV-T7 gene1), dcm(DE3)</i>                                                                                                                                                   |         |
| <b>Plasmids</b> |                                                                                                                                                                                    |         |
| <i>pJL</i>      | Low-copy number plasmid capable of replication in <i>Escherichia coli</i> , but a suicide vector in GAS. Chloramphenicol resistant. Used to generate isoallelic GAS or SAL mutants | 11      |
| <i>pET-28a</i>  | Overexpression vector for N-terminally hexahistidine tagged recombinant proteins, Km <sup>R</sup>                                                                                  | Novagen |

958

959

960

961

962

963

964

965

966

967

968

969

970

971

972

| Primer       | Sequence 5' – 3'                                                                  | Purpose                                                                                         |
|--------------|-----------------------------------------------------------------------------------|-------------------------------------------------------------------------------------------------|
| pJL_marker A | GTATCGATAAGCTTGATATCGAATT<br>CCTGCAGCCCCGGGGGATCTGCTT<br>AGACTGATCTTAGCTTTTCC     | 5' primer for 5' region of RSSL_00112 to replace RSSL_00112 with erythromycin resistance marker |
| pJL_marker B | CATAACTTCTTTTACGTTTCCGCCC<br>GTAAATTTAATCACTTTATTAG                               | 3' primer for 5' region of RSSL_00112 with erm sequence overlap                                 |
| pJL_marker C | CTAATAAAGTGATTAAATTTACGGG<br>CGGAAACGTAAAAGAAGTTATG                               | 5' primer of erm sequence with RSSL_00112 overlap                                               |
| pJL_marker D | GCCGAACCAGTTCTCACTATCTTC<br>CCTTTAGTAACGTGTAAC                                    | 3' primer of erm sequence with RSSL_00112 overlap                                               |
| pJL_marker E | GTTACACGTTACTAAAGGGAAGAT<br>AGTGAGAACTGGTTCGGC                                    | 5' primer for 3' region of RSSL_00112 to replace RSSL_00112 with erm sequence overlap           |
| pJL_marker F | CTCACGTTAAGGGATTTTGGTCAT<br>GAGATTATCAAAAAGGATCAGTCC<br>CTCACATATCATAGTATGGCATTGT | 3' primer for 3' region of RSSL_00112 to replace RSSL_00112                                     |

|                     |                                                                                           |                                                                                  |
|---------------------|-------------------------------------------------------------------------------------------|----------------------------------------------------------------------------------|
|                     | C                                                                                         | with erythromycin                                                                |
| pJL_Δ <i>nrpR</i> A | GTATCGATAAGCTTGATATCGAATT<br>CCTGCAGCCCCGGGGGATCTCCCA<br>TAGCTTTATTAAACGAAAATTTCTTT<br>AC | 5' primer for 5' region<br>of <i>nrpR</i> to delete <i>nrpR</i>                  |
| pJL_Δ <i>nrpR</i> B | GGATGAAATTAATGCATAAATGAAG<br>ATGATCGATTGCTTGTC                                            | 3' primer for 5' region<br>of <i>nrpR</i> to delete <i>nrpR</i>                  |
| pJL_Δ <i>nrpR</i> C | GGACAAGCAATCGATCATCTTCAT<br>TTATGCATTAATTTTCATCC                                          | 5' primer for 3' region<br>of <i>nrpR</i> to delete <i>nrpR</i>                  |
| pJL_Δ <i>nrpR</i> D | GGGATTTTGGTCATGAGATTATCAA<br>AAAGGATCGATATGTCAGGAGCCT<br>ATATGCCACTAG                     | 3' primer for 3' region<br>of <i>nrpR</i> to delete <i>nrpR</i>                  |
| pJL <i>nip</i> * A  | CAATACATTAAGTGTGGAGGTAAC<br>TATTAGTGGTTGATTTTACTATTTCT<br>TTGA                            | 5' primer of <i>nip</i> to<br>change the <i>nip</i> start<br>codon to stop codon |
| pJL <i>nip</i> * B  | TCAAAGAAATAGTAAAATCAACCAC<br>TAATAGTTACCTCCACACTTAATGT<br>ATTG                            | 3' primer of <i>nip</i> to<br>change the <i>nip</i> start<br>codon to stop codon |
| <i>delsalA2</i> A   | GTATCGATAAGCTTGATATCGAATT<br>CCTGCAGCCCCGGGGGATCTCAAT<br>CACCGAGGAATATAGTGCTAG            | 5' primer for 5' region<br>of <i>salA2</i> to delete<br><i>salA2</i>             |
|                     | GTCCACTTATCAAGATTGTTTTGAT                                                                 | 3' primer for 5' region<br>of <i>salA2</i> to delete                             |

|                       |                                                                              |                                                                      |
|-----------------------|------------------------------------------------------------------------------|----------------------------------------------------------------------|
| <i>delsalA2 B</i>     | CTCCCTTCTGTTAGTATGTAG                                                        | <i>salA2</i>                                                         |
| <i>delsalA2 C</i>     | CTACATACTAACAGAAGGGAGATC<br>AAAACAATCTTGATAAGTGGAC                           | 5' primer for 3' region<br>of <i>salA2</i> to delete<br><i>salA2</i> |
| <i>delsalA2 D</i>     | CTCACGTTAAGGGATTTTGGTCAT<br>GAGATTATCAAAAAGGATCTTTCCA<br>TATGTAAGTCCGTAATGG  | 3' primer for 3' region<br>of <i>salA2</i> to delete<br><i>salA2</i> |
| <i>delsalA2_seq_F</i> | CTCGGCAAGAAACAAGAATAAGAG                                                     | 5' primer for 5' region<br>of <i>salA2</i> to sequence<br>the region |
| <i>delsalA2_seq_R</i> | CTAAACTAGCGTTTTTCATTGAAAG<br>GAAC                                            | 3' primer for 3' region<br>of <i>salA2</i> to sequence<br>the region |
| <i>delsalB A</i>      | GTATCGATAAGCTTGATATCGAATT<br>CCTGCAGCCCGGGGGATC<br>GAGGTTTTGAAGGATTTTCTTCTAT | 5' primer for 5' region<br>of <i>salB</i> to delete <i>salB</i>      |
| <i>delsalB B</i>      | AATTTAGGCTTATAGAACGTAATTG<br>GAAATACCTCACTGATTAA                             | 3' primer for 5' region<br>of <i>salB</i> to delete <i>salB</i>      |
| <i>delsalB C</i>      | TTAATCAGTGAGGTATTTCCAATTA<br>CGTTCTATAAGCCTAAATT                             | 5' primer for 3' region<br>of <i>salB</i> to delete <i>salB</i>      |
| <i>delsalB D</i>      | CTCACGTTAAGGGATTTTGGTCAT<br>GAGATTATCAAAAAGGATCCAATAA<br>TAATCACCACAATCAATA  | 3' primer for 3' region<br>of <i>salB</i> to delete <i>salB</i>      |
|                       | GGCTGATGTTAGGTTGGAAAATCC                                                     | 5' primer for 5' region                                              |

|                       |                                                                       |                                                                     |
|-----------------------|-----------------------------------------------------------------------|---------------------------------------------------------------------|
| <i>delsalB</i> _seq_F | G                                                                     | of <i>salB</i> to sequence the region                               |
| <i>delsalB</i> _seq_R | CTATCTCACAGTTTTGCATATCA                                               | 3' primer for 3' region of <i>salB</i> to sequence the region       |
| $\Delta$ <i>sar</i> A | CATGATTACGCCAAGCTTGGTACC<br>GAGCTCGGATCCTTCTGTACAAGA<br>GCTTGTATTGG   | 5' primer for 5' region of <i>sarC</i> to delete <i>PK/NRPs</i> BGC |
| $\Delta$ <i>sar</i> B | GTACTTAATTCAACTTCCATTCAAT<br>ACTACTACCATTATATATT                      | 3' primer for 5' region of <i>sarC</i> to delete <i>PK/NRPs</i> BGC |
| $\Delta$ <i>sar</i> C | AATATATAATGGTAGTAGTATTGAAT<br>GGAAGTTGAATTAAGTAC                      | 5' primer of Chloramphenicol to delete <i>PK/NRPs</i> BGC           |
| $\Delta$ <i>sar</i> D | GTTGACAGTTGAGTAATAAAAGAC<br>ATTAGAAAACCGACTGTAAAAAG                   | 3' primer of Chloramphenicol to delete <i>PK/NRPs</i> BGC           |
| $\Delta$ <i>sar</i> E | CTTTTACAGTCGGTTTTCTAATGT<br>CTTTTATTACTCAACTGTCAAC                    | 5' primer for 3' region of <i>sarP</i> to delete <i>PK/NRPs</i> BGC |
| $\Delta$ <i>sar</i> F | CGAATTCCACACACTGGCGGCCG<br>TTACTAGTGGATCGGTCTAGGCAA<br>CTCCCAGGTTCTTC | 3' primer for 3' region of <i>sarP</i> to delete <i>PK/NRPs</i> BGC |
| <i>speB</i> C192S F   | CAACATGCAGCTACAGGAAGTGTT<br>GCTACTGCAACTGC                            | 5' primer to introduce C192S mutation in                            |

|                      |                                            |                                                          |
|----------------------|--------------------------------------------|----------------------------------------------------------|
|                      |                                            | <i>speB</i> CDS                                          |
| <i>speB</i> C192S R  | GCAGTTGCAGTAGCAACACTTCCT<br>GTAGCTGCATGTTG | 3' primer to introduce C192S mutation in <i>speB</i> CDS |
| <i>tufA</i> top      | CAATCGGACACGTTGACCACGG                     | 5' primer to check the megaplasmid copy number           |
| <i>tufA</i> bottom   | CTGAAAGAAGGTCACGGATTTC                     | 3' primer to check the megaplasmid copy number           |
| <i>tufA</i> qRTFwd   | CAACTCGTCACTATGCGCACAT                     | 5' primer for GAS <i>tufA</i> qRT-PCR                    |
| <i>tufA</i> qRTRev   | GAGCGGCACCAGTGATCAT                        | 3' primer for GAS <i>tufA</i> qRT-PCR                    |
| <i>tufA</i> qRTFwd   | AAAAACGTCACTACGCTCACAT                     | 5' primer for SAL <i>tufA</i> qRT-PCR                    |
| <i>tufA</i> qRTRev   | GAGCGGCACCAGTGATCAT                        | 3' primer for SAL <i>tufA</i> qRT-PCR                    |
| <i>sarD</i> _qRT Fwd | GATGGCAGTTCAAATGGGATTAC                    | 5' primer for <i>nrps</i> qRT-PCR                        |

|                      |                       |                                      |
|----------------------|-----------------------|--------------------------------------|
| <i>sarD</i> _qRT Rev | CTGTACCATGACACTCCACAG | 3' primer for <i>nrps</i><br>qRT-PCR |
| <i>speB</i> _qRT Fwd | ACTCTACCAGCGGATCATTG  | 5' primer for <i>speB</i><br>qRT-PCR |
| <i>speB</i> _qRT Rev | CAGCGGTACCAGCATAAGTAG | 3' primer for <i>speB</i><br>qRT-PCR |

974

- 975 1 Bloudoff, K., Fage, C. D., Marahiel, M. A. & Schmeing, T. M. Structural and  
976 mutational analysis of the nonribosomal peptide synthetase heterocyclization  
977 domain provides insight into catalysis. *Proc. Natl. Acad. Sci. USA* **114**, 95-100  
978 (2017).
- 979 2 Zhang, F. *et al.* MS-Derived Isotopic Fine Structure Reveals Forazoline A as a  
980 Thioketone-Containing Marine-Derived Natural Product. *Org. Lett.* **22**, 1275-  
981 1279 (2020).
- 982 3 Beres, S. B. *et al.* Molecular complexity of successive bacterial epidemics  
983 deconvoluted by comparative pathogenomics. *Proc. Natl. Acad. Sci. USA* **107**,  
984 4371-4376 (2010).
- 985 4 Sumbly, P. *et al.* Evolutionary origin and emergence of a highly successful clone  
986 of serotype M1 group A *Streptococcus* involved multiple horizontal gene  
987 transfer events. *J. Infect. Dis.* **192**, 771-782 (2005).
- 988 5 Fittipaldi, N. *et al.* Full-genome dissection of an epidemic of severe invasive  
989 disease caused by a hypervirulent, recently emerged clone of group A  
990 *Streptococcus*. *Am. J. Pathol.* **180**, 1522-1534 (2012).
- 991 6 Beres, S. B. *et al.* Transcriptome remodeling contributes to epidemic disease  
992 caused by the human pathogen *Streptococcus pyogenes*. *MBio* **7**, e00403-  
993 00416 (2016).
- 994 7 Beres, S. B. *et al.* Molecular genetic anatomy of inter-and intraserotype  
995 variation in the human bacterial pathogen group A *Streptococcus*. *Proc. Natl.*  
996 *Acad. Sci. USA* **103**, 7059-7064 (2006).
- 997 8 Makthal, N. *et al.* Structural and functional analysis of RopB: a major virulence  
998 regulator in *Streptococcus pyogenes*. *Mol. Microbiol.* **99**, 1119-1133 (2016).
- 999 9 Do, H. *et al.* Leaderless secreted peptide signaling molecule alters global gene  
1000 expression and increases virulence of a human bacterial pathogen. *Proc. Natl.*  
1001 *Acad. Sci. USA* **114**, E8498-E8507, doi:10.1073/pnas.1705972114 (2017).

- 1002 10 Barretto, C., Alvarez-Martin, P., Foata, F., Renault, P. & Berger, B. Genome  
1003 sequence of the lantibiotic bacteriocin producer *Streptococcus salivarius* strain  
1004 K12. *J. Bacteriol.* **194**, 5959-5960 (2012).
- 1005 11 Li, J., Kasper, D. L., Ausubel, F. M., Rosner, B. & Michel, J. L. Inactivation of  
1006 the  $\alpha$  C protein antigen gene, *bca*, by a novel shuttle/suicide vector results in  
1007 attenuation of virulence and immunity in group B Streptococcus. *Proc. Natl.*  
1008 *Acad. Sci. USA* **94**, 13251-13256 (1997).
- 1009
